## 1 **Rosa26 docking sites for investigating genetic circuit silencing in stem cells**

2 Michael Fitzgerald<sup>1†</sup>, Mark Livingston<sup>1†</sup>, Chelsea Gibbs<sup>1</sup> and Tara L. Deans<sup>1\*</sup>

3  
4 <sup>1</sup> Department of Biomedical Engineering, University of Utah, Salt Lake City, UT, 84112, USA

5 <sup>†</sup>These authors contributed equally to this work

6 \* To whom correspondence should be addressed. Tel: 801-585-7859; Email:

7 [tara.deans@utah.edu](mailto:tara.deans@utah.edu)

### 8 9 **ABSTRACT**

10  
11 Approaches in mammalian synthetic biology have transformed how cells can be programmed  
12 to have reliable and predictable behaviour, however, the majority of mammalian synthetic  
13 biology has been accomplished using immortalized cell lines that are easy to grow and easy  
14 to transfect. Genetic circuits that integrate into the genome of these immortalized cell lines  
15 remain functional for many generations, often for the lifetime of the cells, yet when genetic  
16 circuits are integrated into the genome of stem cells gene silencing is observed within a few  
17 generations. To investigate the reactivation of silenced genetic circuits in stem cells, the  
18 Rosa26 locus of mouse pluripotent stem cells was modified to contain docking sites for site-  
19 specific integration of genetic circuits. We show that the silencing of genetic circuits can be  
20 reversed with the addition of sodium butyrate, a histone deacetylase inhibitor. These findings  
21 demonstrate an approach to reactivate the function of genetic circuits in pluripotent stem cells  
22 to ensure robust function over many generations. Altogether, this work introduces an approach  
23 to overcome the silencing of genetic circuits in pluripotent stem cells that may enable the use  
24 of genetic circuits in pluripotent stem cells for long-term function.

25  
26 Key words: mammalian synthetic biology, gene circuit silencing, stable integration of gene  
27 circuits, pluripotent stem cells

### 28 **INTRODUCTION**

29  
30 Pluripotent stem cells have the potential to augment tissue regeneration, in addition to creating  
31 cell-specific *in vitro* diagnostics and drug screens because they are capable of self-renewing  
32 and differentiating into any cell type (1). Induced pluripotent stem (iPS) cells can be derived  
33 from mature tissue cells from individuals by expressing key transcription factors (2). However,  
34 despite advances in stem cell culture techniques, differentiation can be inefficient, laborious,  
35 expensive, or otherwise intractable (3,4). It has been proposed that programming reliable cell  
36 behaviour using approaches in synthetic biology can be used for directing cell fate decisions  
37 to enhance their therapeutic potential (1,5,6). For example, using genetic circuits to reprogram  
38 cells to facilitate precise gene regulation can be used to enhance cell differentiation outcomes  
39 for tissue engineering and regenerative medicine applications. Moreover, to capitalize on the  
40 tight gene control of genetic circuits, their stability and function in the genome is critical.

1  
2 Novel genetic tools built by synthetic biologists have transformed how cells can be  
3 reprogrammed and include genetic programs to introduce switching (7-14), oscillations (15-  
4 20), logic gates (21-23), and biosensing (24-30) behaviours into cells. Assembling simple  
5 genetic parts into more complex gene circuits can reliably and predictably control cell  
6 behaviours (31,32). To date, the majority of mammalian synthetic biology has taken place in  
7 easy-to-grow and easy-to-transfect cells, derived from immortalized cell lines. These model  
8 cell lines are useful for enhancing our understanding of synthetic gene circuits that underscore  
9 the potential of synthetic biology tools, however, these cell lines may not be good predictors  
10 of the challenges that arise in stem cells (33). Plasmid and viral gene delivery systems have  
11 been shown to lose expression over weeks of cell culture, which is thought to be a  
12 consequence of epigenetic modifications of the inserted DNA (34-36). The current  
13 understanding of transgene, a gene that has been artificially introduced into the genome,  
14 silencing suggests that silencing of genes can occur through the methylation of the expression  
15 cassette and/or the formation of heterochromatin, both of which facilitate changes in gene  
16 expression; however, the circumstances that trigger these mechanisms are still being  
17 elucidated. To overcome these challenges, several strategies to mitigate the effects of  
18 transgene silencing have been used, such as the inclusion of universal chromatin opening  
19 elements (37,38), scaffold/matrix attachment regions (39), CG free plasmid backbones (40),  
20 minicircle DNA (41), genomic insulators (42), and targeted integration in open chromatin  
21 regions (43). These approaches can significantly lessen transgene silencing, however the  
22 effects are not universal (44,45). Currently, the impact of genetic circuit silencing is not known,  
23 and strategies to alleviate silencing have yet to be explored. Genetic circuits are distinct from  
24 plasmid and viral expression cassettes because they contain multiple genetic modules that  
25 makeup the circuits, resulting in larger DNA constructs that need to be inserted into cells (46).  
26 Since genetic circuits endow cells with tight gene control, they have been a focus for directing  
27 stem cell fate to enable both timed and tuned gene expression that match the evolving  
28 requirements of the differentiating cells as they undergo cell fate decisions (47). Altogether,  
29 reliable stem cell programming with genetic circuits will require tools that integrate into the  
30 genome, have predictable expression patterns in differentiated cells, and avoid disruption of  
31 endogenous genes and pathways.

32  
33 One previously shown approach to avoid epigenetic silencing of integrated genetic circuits is  
34 to engineer genomic safe harbour sites within the genome that support the integration of  
35 genetic material to those specific genomic locations, or loci. Additionally, safe harbour loci  
36 within the genome limit transgene silencing caused by unpredictable genome interactions  
37 associated with random insertions (34,48). The Rosa26 locus in mice has been observed to

1 facilitate the ubiquitous expression of transgenes in developing and adult tissue when inserted  
2 at this site, suggesting that transgenes are active in germ cells, in addition to the differentiated  
3 progeny of those cells (49,50). This locus has also been used in Chinese Hamster Ovarian  
4 (CHO) cells for targeted integration that demonstrates stable integration (51). Therefore, the  
5 Rosa26 locus is an ideal location to target for inserting genetic circuits to study their stability  
6 and function, in stem cells.

7  
8 Here, genetic circuit silencing was studied by observing circuit function in pluripotent stem  
9 cells by engineering a mouse embryonic stem (ES) cell line with three  $\phi$ C31 docking sites on  
10 one allele of the Rosa26 locus to function as a landing pad for large genetic circuits that have  
11 a matching recombinase. The 8kb genetic circuit, LTRi (Lac Tet RNAi), was chosen because  
12 it is relatively complex in architecture and the genetic circuit permits tuneable control of gene  
13 expression (9,52,53). Enhanced green fluorescence protein (EGFP) was controlled by LTRi,  
14 LTRi\_EGFP, to study the ability to reverse the silencing of gene expression once stably  
15 integrated into the genome.

## 16 17 **MATERIAL AND METHODS**

### 18 19 **Design of plasmids**

20 The homology repair template for CRISPR was Gibson assembled to include 1kb homology  
21 arms, an FRT-flanked neomycin resistance gene, 3x attP sites, and a blue fluorescent protein  
22 (BFP) expression cassette (Addgene #36086). The 1kb upstream and 1kb downstream arms  
23 were amplified from purified mouse genome from AB2.2 ES cells (ATCC #SCRC-1023) and  
24 verified by sequencing (Supplemental Figure S1F). The Cas9/gRNA plasmid was obtained  
25 from the University of Utah Mutation Generation and Detection Core (gRNA homology:  
26 TGGGCGGGAGTCTTCTGGGC). Modifications were made to the LTRi genetic switch to  
27 exchange viral promoters with non-viral promoters, namely mEF1 and rEF1 promoters from  
28 the pVltro1-msc plasmid (InvivoGen #pvitro1-mcs) and the addition of an attP docking site  
29 recognition sequence. The modified LTRi genetic switch (mLTRi) was constructed by cloning  
30 the transgene module into the vector module with DraIII and XhoI cut sites, and the individual  
31 modules were put together by Gibson assembly. mLTRi\_EGFP is in process of being  
32 submitted to Addgene (addgene.org).

### 33 34 **Cell culture**

35  
36 Mouse embryonic stem (ES) cells (ATCC #SCRC-1023) were maintained in high glucose  
37 knockout DMEM (Life Technologies #10829-018) supplemented with 15% ES certified FBS  
38 (LifeTechnologies #10439024), 1% nonessential amino acids (Life Technologies #11140050),

1 1mM L-glutamine (Life Technologies #25030-081), 0.1 mM 2-mercaptoethanol (Life  
2 Technologies #21985023), and 200 units/mL penicillin and streptomycin. The ES cells were  
3 plated on mitomycin C treated mouse embryonic fibroblast cells (Millipore Sigma #PMEF-NL-  
4 P1) that are G418 resistant. All cell lines were grown in a humidified 5% CO<sub>2</sub>, 37°C incubator.  
5 The feeder cells were grown in high glucose DMEM medium supplemented with 10% FBS, 1%  
6 L-glutamine solution, and 200 units/mL penicillin and streptomycin until seeded with mouse  
7 ES cells, at which time the media conditions were as stated for the ES cells.

## 8 **CRISPR modified pluripotent stem cells**

9

10 Plasmid DNA containing the repair template with three tandem attP sites was co-transfected  
11 (1:1, Jetprime VWR#89129) with a plasmid containing Rosa26-Cas9/gRNA into mouse ES  
12 cells when confluency reached 70%. The cells were selected by adding 200 µg/ml neomycin  
13 (G418 Life Technologies #10131035) to the growth medium. Resistant clones were expanded  
14 and screened for the on-site genomic edit by genomic PCR. Copy number qPCR (Power Sybr,  
15 ThermoFisher #4368577) was used to determine off-site integration. The neomycin resistance  
16 gene was removed by transfecting and flow sorting (Beckon Dickenson FACSAria) the  
17 candidate cell line with a plasmid harbouring EGFP-flip recombinase and assessing the  
18 reacquisition of neomycin sensitivity.

19

## 20 **Docking plasmids**

21

22 mLTRi-EGFP cell lines were established by co-transfection with  $\phi$ C31 integrase in the 3X-attP  
23 AB2.2 mouse ES cells. Cells that had the mLTRi-EGFP plasmid contained a neomycin  
24 resistant cassette so these transfected ES cells were selected by G418, and resistant lines  
25 were clonally expanded and further screened by inducibility with 250 µM IPTG. One of the  
26 positive clones was chosen and used for the entire study reported here.

## 27 **Quantitative PCR primer design**

28

29 All primers were design with NCBI's primer blast to have a PCR product size between 70bp  
30 and 200bp and a melting temperature between 58°C and 62°C (Table S1). The primers  
31 for known copy number (GAPDH and ZFY1) were designed to not span and exon junction  
32 because the template was genomic DNA. The primers were tested to ensure that there was  
33 no alignment with non-specific sequences. Each primer was tested using a 2x dilution of  
34 genomic DNA to ensure a single melting curve peak to ensure specific binding to only the  
35 desired location.

36

## 37 **Quantitative PCR**

38

1 Genomic DNA was isolated from the ES cells using lysis buffer (100mMTris-Cl, 5mM  
2 EDTA, 200mM NaCl, 0.2% SDS) and proteinase K as previously reported (54). The DNA was  
3 then precipitated in  $C_2H_3NaO_2$  and isopropanol and washed in EtOH. After genomic DNA  
4 elution and quantification using a NanoDrop (ThermoFisher) and a 1 ng/ $\mu$ l stock was  
5 created. From the 1ng/ $\mu$ l stock a 2x dilution was prepared for each qPCR experiment. Each  
6 well of the qPCR reaction contained: 10ul of Power SYBR Green PCR Master Mix  
7 (ThermoFisher #4367659), 2 ul of a 3  $\mu$ M forward primer that anneals to, 2ul of a 3  $\mu$ M reverse  
8 primer, genomic DNA, and up to 6 ul of  $H_2O$ . The experiments were performed in triplicates  
9 on 96 well plates and used the StepOne™ Real-Time PCR System (ThermoFisher) where a  
10 standard curve was generated for each gene. The Ct value vs. the log of amount of DNA was  
11 plotted. The slope was calculated for each gene and the unknown 3x attP was compared to  
12 the known genes. Given that two copies of GAPDH exist in the genome, and only one copy of  
13 ZFY1, which is a gene on the Y chromosome (we used male ES cells) exist in the genome,  
14 CT values and slopes were compared to the attP sample.

15

#### 16 **Reactivation of silenced gene circuit and flow cytometry**

17

18 Silenced mouse ES cells were induced with 250 $\mu$ M IPTG in the presence or absence of  
19 epigenetic modifying drugs at the concentrations noted in text and within the figure legends.  
20 Modifying drugs were purchased from the following: sodium butyrate (VWR #89147), 5-  
21 azacytodine (Sigma Aldrich #A2385). Cells were treated with the drug for 24 hours with and  
22 without IPTG and EGFP expression was assessed by flow cytometry using a Beckman Coulter  
23 CytoFLEX S. Flow data was analyzed using FlowJo software.

24

25 To find the maximum recovered EGFP expression from silenced cells, the cells with  
26 LTRi\_EGFP stably integrated into the Rosa26 locus that stopped expressing EGFP were used  
27 to determine the amount of NaB that would recover gene expression and still maintain the  
28 health of the cells by adding 250  $\mu$ M IPTG and varying the amount of NaB. For studying the  
29 activation of EGFP expression in stably transfected mouse ES cells after the exposure to NaB,  
30 silenced ES cells were grown on top of a MEF layer in a 10cm<sup>2</sup> tissue culture dish for 48 hours  
31 in the absence of IPTG. After exposure to NaB for 48 hours, the cells were passed to a 24  
32 well plate containing a fresh feeder layer of MEFs in the absence of NaB. Twenty-four hours  
33 after passing the cells and removing NaB, 250  $\mu$ M IPTG was added to each of three separate  
34 wells. Twenty-four hours after adding 250  $\mu$ M IPTG, the cells were collected and EGFP was  
35 quantified using flow cytometry (Day 1). Forty-eight hours after passing the cells, 250  $\mu$ M of  
36 IPTG was added to each of three separate wells. Twenty-four hours after adding 250  $\mu$ M IPTG,

1 the cells were collected and EGFP was quantified using flow cytometry (Day 2). Seventy-two  
2 hours after passing the cells and removing NaB, 250  $\mu$ M of IPTG was added to each of three  
3 separate wells. Twenty-four hours after adding 250  $\mu$ M IPTG, the cells were collected and  
4 EGFP was quantified using flow cytometry (Day 3). Seventy-two hours after passing the cells  
5 and removing NaB, 250  $\mu$ M of IPTG was added to each of three separate wells. Ninety-six  
6 hours after adding 250  $\mu$ M IPTG, the cells were collected and EGFP was quantified using flow  
7 cytometry (Day 4). For studying the impact of NaB on silenced cells, and the longevity of  
8 recovering circuit function, cells were grown in 250  $\mu$ M NaB alone in addition to NaB and IPTG  
9 for eight days.

## 10 RESULTS

### 11 Generation of $\phi$ C31 docking sites in the Rosa26 locus of pluripotent stem cells

12  
13 Clustered regularly interspaced short palindromic repeats (CRISPR)/Cas9 technology enable  
14 the targeting of specific locations within the genome. Utilizing CRISPR/Cas9 with customized  
15 guide RNAs (gRNAs) to target specific locations within the genome offers a useful method for  
16 engineering landing pads for genetic circuits at desired locations within the genome. Indeed,  
17 CRISPR/Cas9 can be used for inserting new sequences of DNA, however, the efficiency is  
18 significantly decreased when inserting DNA sequences larger than 5 kb (55). Because most  
19 genetic circuits that function in mammalian cells are larger than 5 kb, inserting a landing pad  
20 that has a site-specific recombinase can increase efficiency of integration of these larger DNA  
21 constructs into the genome when recombinase recognition sites matching the recombinase  
22 are present in the plasmid containing the DNA to be inserted (51).

23  
24 To allow for targeted and efficient integration of genetic circuits into the genome of pluripotent  
25 stem cells,  $\phi$ C31 docking sites were inserted into the Rosa26 locus (Figure 1A) of mouse ES  
26 cells using CRISPR/Cas9 technology. Three tandem  $\phi$ C31 integrase *attP* sites were inserted  
27 that serve as a landing pad for larger DNA additions containing an *attB* sequence (50). To  
28 create an efficient screening method, a neomycin resistance gene flanked by *FRT* sites was  
29 added upstream of the 3x *attP* sites inside the homology arms of the repair DNA plasmid, and  
30 outside of the arms, a blue fluorescent protein (BFP) cassette was included (Figure 1B). This  
31 plasmid was co-transfected with Cas9 endonuclease and a gRNA that targets the Rosa26  
32 locus. Adding neomycin (G418) to the media of transfected cells enables for the selection of  
33 ES colonies that have the landing pad integrated into the genome at the Rosa26 locus (Figure  
34 1C). CRISPR/Cas9 technology has shown to have off target effects, namely whole or parts of  
35 the repair template integrate into the genome at random locations, rather than just the repair  
36 DNA flanked by the homology arms in the targeted location (56-59). To screen for off-target



1 insertions, a BFP cassette was added outside of the homology arms in the repair DNA  
2 template (Figure 1B). Therefore, any ES colony expressing BFP would indicate that the repair  
3 plasmid was incorrectly integrated into the genome and discarded. The ES cells resistant to  
4 G418 that did not express BFP were selected and verified by PCR for the on-site insertion of  
5 *attP* sites in the *Rosa26* locus with primers designed to span part of the neomycin resistance  
6 gene and the genomic DNA beyond the homology arm (Figure 1C). ES clones with an on-site  
7 edit produced a 1.6 kb amplicon (Figure 1C and Supplemental Figure S1B) that contained an  
8 *XbaI* site and when isolated and cut with *XbaI* endonuclease produced the predicted 1.1 kb  
9 and 500 bp bands (Supplemental Figure S1C). DNA sequencing was also performed and  
10 further confirmed the insertion of the repair DNA in the *Rosa26* locus.

11  
12  
13

### Screen of the mouse genome for correct genomic edits

14 To assess the number of docking sites integrated into the mouse genome, quantitative PCR  
15 (qPCR) was performed to verify whether additional integrations occurred elsewhere within the  
16 genome (Figure 1E). By referencing two genes of known copy number, *ZFY1* on the Y  
17 chromosome (one copy), and *GAPDH* on chromosome 6 (two copies), it was possible to  
18 determine how many times the docking site was inserted into the genome. Primers were  
19 designed to anneal at the end of the 3x *attP* sequence and included part of the genomic  
20 *Rosa26* sequence to give a ~100mer amplicon (Figure 1C). The mean Ct values of each  
21 primer set vs. the log of DNA (ng) were plotted as previously described (54). The slope of Ct  
22 values vs. log of DNA of each sample was calculated and compared to the slope of *ZFY1* and  
23 *GAPDH*. Since the slope of the *attP* amplicon matched that of the *ZFY1*, it shows that the  
24 docking site was added once (Figure 1C). Once correct docking was confirmed, the neomycin  
25 resistance gene was removed by transfecting the confirmed heterozygous ES line with a  
26 plasmid harbouring flip recombinase, leaving the 3x *attP* sites (Figure 1D). To validate that the  
27 resistant cassette was removed, the *FLP* transfected ES cells were clonally expanded,  
28 assessed for neomycin sensitivity, and verified by PCR. The amplification of the wild type ES  
29 *Rosa26* locus is expected to be 1.1kb, while the addition of the *attP* sites without neomycin is  
30 expected to increase in size to 1.4kb (Supplemental Figure S1E). Results indicate that the ES  
31 cell line has the *Rosa26* site-specific addition of 3x *attP* sites at one allele and is nowhere else  
32 in the genome.

33  
34  
35

### Docking genetic circuits

36 To assess the function of *LTRi\_EGFP* in mouse ES cells over time, the genetic circuit was  
37 integrated into the *Rosa26* locus at the docking sites. First, to rule out the possibility of CMV  
38 and RSV being silenced (60), *LTRi* was modified to replace the original CMV and RSV

1 promoters with the non-viral promoters mouse Elongation Factor-1 (mEF1), and rat Elongation  
2 Factor-1 (rEF1) (Figure 2A-B). Site-specific docking of the modified LTRi (mLTRi)\_EGFP  
3 genetic circuit was accomplished by adding an *attB* sequence to the plasmid. Along with the  
4 genetic circuit, the plasmid also contained a neomycin resistance cassette for G418 selection  
5 of transfected ES cells. The mLTRi genetic circuit containing an *attB* sequence was co-  
6 transfected with  $\phi$ C31 integrase, resulting in the mLTRi genetic circuit stably integrated into  
7 the genome. ES cells resistant to G418 were clonally expanded and screened for their  
8 response to the chemical inducer, isopropyl  $\beta$ -D-1-thiogalactopyranoside (IPTG), a small  
9 molecule that activates gene expression of the genetic circuit (9,52,53). To confirm docking,  
10 the IPTG responsive cell lines were screened for integration into Rosa26 by conventional PCR  
11 with primers flanking the Rosa locus and the genetic circuit, which is expected to produce a  
12 1.3kb amplicon (Supplementary Figure S2A and S2B).

13

### 14 **Assessing circuit function in the Rosa26 locus over time**

15

16 To investigate the function of the mLTRi genetic circuit in pluripotent stem cells, mLTRi was  
17 docked into the Rosa26 locus of mouse ES cells and the cells expressing EGFP in the  
18 presence of IPTG. The EGFP expressing cells were single cell sorted and cultured for more  
19 than three weeks in the presence or absence of IPTG. EGFP was assessed using fluorescent  
20 microscopy and results show that ES colonies cultured beyond three weeks significantly lost  
21 their ability to express EGFP in the presence of IPTG compared to cells in earlier time points  
22 (Figure 2C-D').

23

### 24 **Reactivation of silenced mLTRi in pluripotent stem cells**

25

26 To investigate methods to reactivate mLTRi\_EGFP, we looked at two common mechanisms  
27 of transgene silencing that are frequently cited as barriers when introducing transgenes were  
28 studied. The first, promoter methylation, occurs with the methylation of cytosine residues in  
29 CpG sequences by the cytosine DNA methyltransferase (DNMT1) enzyme and can be  
30 reversed with methyltransferase inhibitor 5-aza-deoxycytidine (AzaC) (61-66). The second,  
31 histone acetylation, is a process where an acetyl group is added to a lysine residue on the tail  
32 of a histone by histone deacetylase, which can be prevented by sodium butyrate (NaB), a  
33 known histone deacetylase inhibitor (HDACi) (67-69).

34

35 To test whether the silenced genetic circuit could be reactivated, ES colonies that lost their  
36 ability to respond to IPTG were grown in the presence of the inhibitors AzaC or NaB for 48  
37 hours, and EGFP expression was assessed using flow cytometry (Figure 4A). EGFP  
38 expression was reactivated in the presence of NaB. Next, to determine the optimal



1 concentration of NaB for recovering genetic circuit function, various concentrations of NaB  
2 were added to the media of silenced ES cells in the presence of 250  $\mu$ M IPTG (Figure 3B and  
3 Supplemental Figure S3). While 500  $\mu$ M NaB showed the most recovery of EGFP expression,  
4 cells grown in this conditions displayed morphological changes and the cells did not appear  
5 as healthy as the cells grown in lower concentrations of NaB. The 250  $\mu$ M concentration of  
6 NaB did not appear to alter the growth rate or the morphology of the ES cells over time.  
7 Therefore, the 250  $\mu$ M concentration of NaB was used in our experiments. To determine  
8 whether EGFP expression. To determine whether EGFP expression dynamics could be  
9 recovered, ES cells that recovered their EGFP expression in the presence of 250  $\mu$ M NaB  
10 were sorted by flow cytometry and grown in various concentrations of IPTG (Figure 3C) over  
11 various time points. These data show that exposure to 250  $\mu$ M NaB for 48 hours reverses the  
12 silencing of mLTRi\_EGFP and allows for the recovery of the genetic circuit function.

13

#### 14 **Investigating the activation of EGFP in stable ES cells.**

15 To explore the activation of EGFP in the silenced stable ES cell line, we first looked at inducing  
16 EGFP expression with IPTG after exposure to 250 $\mu$ M NaB for 48 hours (Figure 4A and  
17 Supplemental Figure S4). To determine how long after NaB exposure genetic circuits could  
18 be activated with IPTG, cells were grown in a 10cm dish in the presence of NaB for 48 hours.  
19 After 48 hours, the cells were washed and passed into 24-well plates. Twenty-four hours after  
20 passing and the removal of NaB (Figure 4A, 1 Day), IPTG was added and EGFP fluorescence  
21 was quantified 24 hours after the addition of IPTG using flow cytometry. IPTG was  
22 subsequently added 2, 3, and 4 days after the removal of NaB and the passage of cells into  
23 the 24-well plates. We observed that EGFP expression could be rescued up to 3-4 days after  
24 the removal of NaB.

25

26 To better assess whether NaB non-selectively activates gene expression, EGFP expression  
27 in stably transfected ES cells was compared to cells grown in the presence and absence of  
28 250 $\mu$ M NaB and 250 $\mu$ M IPTG over 8 days (Figure 4B and Supplemental Figure S5). We  
29 observed that adding NaB alone to the media did not activate the expression of EGFP in the  
30 genetic circuit and that EGFP expression can be maintained for at least 8 days with the  
31 addition of NaB and IPTG.

32

#### 33 **DISCUSSION**

34

35 To date, genetic circuits in mammalian cells have primarily been reported in easy to grow and  
36 easy to transfect immortalized cell lines. Pluripotent stem cells have the potential to give rise  
37 to all cell types in the body and can propagate indefinitely under the right culturing conditions.

1 Because pluripotent stem cells represent a single cell source that can make large contributions  
2 toward currently unmet clinical needs for regenerating damaged and diseased tissue, tightly  
3 controlling specific genes is critical for effectively driving stem cell differentiation into desired  
4 lineages. Novel genetic tools built by synthetic biologists allow for such control in a variety of  
5 mammalian cell lines. However, gene expression from transgene expression systems have  
6 been shown to have heterogenic expression patterns that are often silenced by epigenetic  
7 modifications over time (61,62). To overcome this limitation, we have engineered mouse  
8 embryonic stem cells with  $\phi$ C31 docking sites using CRISPR/Cas9 technology to allow for the  
9 targeted insertion of genetic circuits into the Rosa26 locus. This docking site functions as a  
10 landing pad for genetic circuits that have a matching recombinase to be targeted for insertion  
11 at this genome location. Docked mLTRi\_EGFP in this location demonstrated robust circuit  
12 function for up to three weeks of culture, however, after three weeks, EGFP expression  
13 significantly decreased and mLTRi\_EGFP was no longer responsive to IPTG induction.

14

15 To overcome silencing in pluripotent stem cells, we showed that adding the HDAC inhibitor,  
16 NaB, to the media recovers the genetic circuit function for at least 8 days. This 8-day recovery  
17 of circuit function may be sufficient for directing certain differentiation pathways that turn on  
18 early in development and/or for activating transcriptional cascades capable of regulating later  
19 cell fate signals responsible for developmental regulation (70).

20

21 Taken together, this study demonstrates that genetic circuits can be inserted into the genome  
22 of pluripotent stem cells and if circuit function diminishes over time, NaB can be added to the  
23 growth media to re-establish circuit function. These data raise the exciting possibility of using  
24 synthetic biology in pluripotent stem cells for many therapeutic applications.

25

## 26 **MATERIALS AND DATA AVAILABILITY**

27 Any data or unique materials (e.g. DNA sequences) presented in the manuscript may be  
28 available from the authors upon reasonable request and may require a materials transfer  
29 agreement. The mLTRi\_EGFP plasmid is currently being deposited to Addgene (addgene.org).

30

## 31 **SUPPLEMENTARY DATA**

32 Supplementary data are available at SYN BIO online.

33

## 34 **ACKNOWLEDGEMENTS**

35

36 We thank the members of the Deans Laboratory for helpful discussions on the manuscript,  
37 and the University of Utah Flow Cytometry Facility that is funded by the National Cancer

1 Institute [5P30CA042014-24], and by the National Centre for Research of the National  
2 Institutes of Health [1S10RR026802-01].

3

#### 4 **FUNDING**

5

6 This work was supported by the University of Utah start-up funds, the National Science  
7 Foundation CAREER Program [CBET-1554017 to TLD], the Office of Naval Research Young  
8 Investigator Program [N00014-16-1-3012 to TLD], and the National Institute of Health  
9 Trailblazer Award [1R21EB025413-01 to TLD]. This work was also supported by the University  
10 of Utah Undergraduate Research Opportunities Program (UROP) to CG.

11

#### 12 **CONFLICT OF INTEREST**

13

14 None.

15

#### 16 **AUTHOR CONTRIBUTIONS**

17

18 MF constructed the mLTRi genetic circuit and made the stable cell lines. CG designed the  
19 quantitative PCR screen. ML helped with quantifying the reactivation of the genetic circuit  
20 using flow cytometry. All authors analyzed the data, wrote, and edited the manuscript.

21

## 1 REFERENCES

- 2 1. Bush, L.M., Gibbs, C. and Deans, T.L. (2019) Synthetic biology: paving the way with  
3 novel drug delivery. *The Biochemist*, **41**, 24.
- 4 2. Takahashi, K. and Yamanaka, S. (2006) Induction of pluripotent stem cells from  
5 mouse embryonic and adult fibroblast cultures by defined factors. *Cell*, **126**, 663-  
6 676.
- 7 3. Abdelalim, E.M. and Emara, M.M. (2015) Advances and challenges in the  
8 differentiation of pluripotent stem cells into pancreatic beta cells. *World J Stem*  
9 *Cells*, **7**, 174-181.
- 10 4. Youssef, A.A., Ross, E.G., Bolli, R., Pepine, C.J., Leeper, N.J. and Yang, P.C. (2016) The  
11 Promise and Challenge of Induced Pluripotent Stem Cells for Cardiovascular  
12 Applications. *JACC Basic Transl Sci*, **1**, 510-523.
- 13 5. Healy, C.P. and Deans, T.L. (2019) Genetic circuits to engineer tissues with  
14 alternative functions. *J Biol Eng*, **13**, 39.
- 15 6. Vogel, A.M., Persson, K.M., Seamons, T.R. and Deans, T.L. (2019) Synthetic biology  
16 for improving cell fate decisions and tissue engineering outcomes. *Emerging*  
17 *Topics in Life Sciences*.
- 18 7. Callura, J.M., Cantor, C.R. and Collins, J.J. (2012) Genetic switchboard for synthetic  
19 biology applications. *Proceedings of the National Academy of Sciences of the United*  
20 *States of America*, **109**, 5850-5855.
- 21 8. Chang, A.L., Wolf, J.J. and Smolke, C.D. (2012) Synthetic RNA switches as a tool for  
22 temporal and spatial control over gene expression. *Current opinion in*  
23 *biotechnology*, **23**, 679-688.
- 24 9. Deans, T.L., Cantor, C.R. and Collins, J.J. (2007) A tunable genetic switch based on  
25 RNAi and repressor proteins for regulating gene expression in mammalian cells.  
26 *Cell*, **130**, 363-372.
- 27 10. Fitzgerald, M., Gibbs, C., Shimpi, A.A. and Deans, T.L. (2017) Adoption of the Q  
28 Transcriptional System for Regulating Gene Expression in Stem Cells. *ACS*  
29 *synthetic biology*, **6**, 2014-2020.
- 30 11. Gardner, T.S., Cantor, C.R. and Collins, J.J. (2000) Construction of a genetic toggle  
31 switch in *Escherichia coli*. *Nature*, **403**, 339-342.
- 32 12. Green, A.A., Silver, P.A., Collins, J.J. and Yin, P. (2014) Toehold switches: de-novo-  
33 designed regulators of gene expression. *Cell*, **159**, 925-939.
- 34 13. Kramer, B.P., Viretta, A.U., Daoud-El-Baba, M., Aubel, D., Weber, W. and  
35 Fussenegger, M. (2004) An engineered epigenetic transgene switch in mammalian  
36 cells. *Nature biotechnology*, **22**, 867-870.
- 37 14. Weber, W. and Fussenegger, M. (2011) Molecular diversity--the toolbox for  
38 synthetic gene switches and networks. *Curr Opin Chem Biol*, **15**, 414-420.
- 39 15. Danino, T., Mondragon-Palomino, O., Tsimring, L. and Hasty, J. (2010) A  
40 synchronized quorum of genetic clocks. *Nature*, **463**, 326-330.
- 41 16. Elowitz, M.B. and Leibler, S. (2000) A synthetic oscillatory network of  
42 transcriptional regulators. *Nature*, **403**, 335-338.
- 43 17. Fung, E., Wong, W.W., Suen, J.K., Bulter, T., Lee, S.G. and Liao, J.C. (2005) A synthetic  
44 gene-metabolic oscillator. *Nature*, **435**, 118-122.
- 45 18. Judd, E.M., Laub, M.T. and McAdams, H.H. (2000) Toggles and oscillators: new  
46 genetic circuit designs. *BioEssays : news and reviews in molecular, cellular and*  
47 *developmental biology*, **22**, 507-509.

- 1 19. Stricker, J., Cookson, S., Bennett, M.R., Mather, W.H., Tsimring, L.S. and Hasty, J.  
2 (2008) A fast, robust and tunable synthetic gene oscillator. *Nature*, **456**, 516-519.
- 3 20. Tigges, M., Marquez-Lago, T.T., Stelling, J. and Fussenegger, M. (2009) A tunable  
4 synthetic mammalian oscillator. *Nature*, **457**, 309-312.
- 5 21. Guet, C.C., Elowitz, M.B., Hsing, W. and Leibler, S. (2002) Combinatorial synthesis  
6 of genetic networks. *Science*, **296**, 1466-1470.
- 7 22. Schukur, L. and Fussenegger, M. (2016) Engineering of synthetic gene circuits for  
8 (re-)balancing physiological processes in chronic diseases. *Wiley Interdiscip Rev*  
9 *Syst Biol Med*, **8**, 402-422.
- 10 23. Siuti, P., Yazbek, J. and Lu, T.K. (2013) Synthetic circuits integrating logic and  
11 memory in living cells. *Nature biotechnology*, **31**, 448-452.
- 12 24. Bowsler, C.G. and Swain, P.S. (2014) Environmental sensing, information transfer,  
13 and cellular decision-making. *Current opinion in biotechnology*, **28C**, 149-155.
- 14 25. Brenner, M., Cho, J.H. and Wong, W.W. (2017) Synthetic biology: Sensing with  
15 modular receptors. *Nature chemical biology*, **13**, 131-132.
- 16 26. Daringer, N.M., Dudek, R.M., Schwarz, K.A. and Leonard, J.N. (2014) Modular  
17 extracellular sensor architecture for engineering mammalian cell-based devices.  
18 *ACS synthetic biology*, **3**, 892-902.
- 19 27. Feng, J., Jester, B.W., Tinberg, C.E., Mandell, D.J., Antunes, M.S., Chari, R., Morey, K.J.,  
20 Rios, X., Medford, J.I., Church, G.M. *et al.* (2015) A general strategy to construct  
21 small molecule biosensors in eukaryotes. *Elife*, **4**, 1-23.
- 22 28. Slomovic, S. and Collins, J.J. (2015) DNA sense-and-respond protein modules for  
23 mammalian cells. *Nature methods*, **12**, 1085-1090.
- 24 29. Smole, A., Lainscek, D., Bezeljak, U., Horvat, S. and Jerala, R. (2017) A Synthetic  
25 Mammalian Therapeutic Gene Circuit for Sensing and Suppressing Inflammation.  
26 *Molecular therapy : the journal of the American Society of Gene Therapy*, **25**, 102-  
27 119.
- 28 30. Youk, H. and Lim, W.A. (2014) Secreting and sensing the same molecule allows  
29 cells to achieve versatile social behaviors. *Science*, **343**, 1242782.
- 30 31. MacDonald, I.C. and Deans, T.L. (2016) Tools and applications in synthetic biology.  
31 *Adv Drug Deliv Rev*, **105**, 20-34.
- 32 32. Weisenberger, M.S. and Deans, T.L. (2018) Bottom-up approaches in synthetic  
33 biology and biomaterials for tissue engineering applications. *J Ind Microbiol*  
34 *Biotechnol*, **45**, 599-614.
- 35 33. Ceroni, F. and Ellis, T. (2018) The challenges facing synthetic biology in  
36 eukaryotes. *Nature reviews. Molecular cell biology*.
- 37 34. Papapetrou, E.P. and Schambach, A. (2016) Gene Insertion Into Genomic Safe  
38 Harbors for Human Gene Therapy. *Molecular therapy : the journal of the American*  
39 *Society of Gene Therapy*, **24**, 678-684.
- 40 35. Godecke, N., Zha, L., Spencer, S., Behme, S., Riemer, P., Rehli, M., Hauser, H. and  
41 Wirth, D. (2017) Controlled re-activation of epigenetically silenced Tet promoter-  
42 driven transgene expression by targeted demethylation. *Nucleic acids research*,  
43 **45**, e147.
- 44 36. Bencsik, R., Boto, P., Szabo, R.N., Toth, B.M., Simo, E., Balint, B.L. and Szatmari, I.  
45 (2016) Improved transgene expression in doxycycline-inducible embryonic stem  
46 cells by repeated chemical selection or cell sorting. *Stem Cell Res*, **17**, 228-234.
- 47 37. Muller-Kuller, U., Ackermann, M., Kolodziej, S., Brendel, C., Fritsch, J., Lachmann,  
48 N., Kunkel, H., Lausen, J., Schambach, A., Moritz, T. *et al.* (2015) A minimal  
49 ubiquitous chromatin opening element (UCOE) effectively prevents silencing of

- 1           juxtaposed heterologous promoters by epigenetic remodeling in multipotent and  
2 pluripotent stem cells. *Nucleic acids research*, **43**, 1577-1592.
- 3 38. Zhang, F., Frost, A.R., Blundell, M.P., Bales, O., Antoniou, M.N. and Thrasher, A.J.  
4 (2010) A ubiquitous chromatin opening element (UCOE) confers resistance to  
5 DNA methylation-mediated silencing of lentiviral vectors. *Molecular therapy : the*  
6 *journal of the American Society of Gene Therapy*, **18**, 1640-1649.
- 7 39. Zhao, C.P., Guo, X., Chen, S.J., Li, C.Z., Yang, Y., Zhang, J.H., Chen, S.N., Jia, Y.L. and  
8 Wang, T.Y. (2017) Matrix attachment region combinations increase transgene  
9 expression in transfected Chinese hamster ovary cells. *Sci Rep*, **7**, 42805.
- 10 40. Bazzani, R.P., Pringle, I.A., Connolly, M.M., Davies, L.A., Sumner-Jones, S.G., Schleef,  
11 M., Hyde, S.C. and Gill, D.R. (2016) Transgene sequences free of CG dinucleotides  
12 lead to high level, long-term expression in the lung independent of plasmid  
13 backbone design. *Biomaterials*, **93**, 20-26.
- 14 41. Chen, Z.Y., Riu, E., He, C.Y., Xu, H. and Kay, M.A. (2008) Silencing of episomal  
15 transgene expression in liver by plasmid bacterial backbone DNA is independent  
16 of CpG methylation. *Molecular therapy : the journal of the American Society of Gene*  
17 *Therapy*, **16**, 548-556.
- 18 42. Macarthur, C.C., Xue, H., Van Hoof, D., Lieu, P.T., Dudas, M., Fontes, A., Swistowski,  
19 A., Touboul, T., Seerke, R., Laurent, L.C. *et al.* (2012) Chromatin insulator elements  
20 block transgene silencing in engineered human embryonic stem cell lines at a  
21 defined chromosome 13 locus. *Stem Cells Dev*, **21**, 191-205.
- 22 43. Strathdee, D., Ibbotson, H. and Grant, S.G. (2006) Expression of transgenes  
23 targeted to the Gt(ROSA)26Sor locus is orientation dependent. *PloS one*, **1**, e4.
- 24 44. Hoffmann, D., Schott, J.W., Geis, F.K., Lange, L., Muller, F.J., Lenz, D., Zychlinski, D.,  
25 Steinemann, D., Morgan, M., Moritz, T. *et al.* (2017) Detailed comparison of  
26 retroviral vectors and promoter configurations for stable and high transgene  
27 expression in human induced pluripotent stem cells. *Gene Ther*, **24**, 298-307.
- 28 45. Saunders, F., Sweeney, B., Antoniou, M.N., Stephens, P. and Cain, K. (2015)  
29 Chromatin function modifying elements in an industrial antibody production  
30 platform--comparison of UCOE, MAR, STAR and cHS4 elements. *PloS one*, **10**,  
31 e0120096.
- 32 46. Deans, T.L. (2014) Parallel Networks: Synthetic Biology and Artificial Intelligence.  
33 *ACM Journal on Emerging Technologies in computing systems (JETC)*, **11**, 21:21-  
34 21:11.
- 35 47. Tsankov, A.M., Gu, H., Akopian, V., Ziller, M.J., Donaghey, J., Amit, I., Gnirke, A. and  
36 Meissner, A. (2015) Transcription factor binding dynamics during human ES cell  
37 differentiation. *Nature*, **518**, 344-349.
- 38 48. Soriano, P. (1999) Generalized lacZ expression with the ROSA26 Cre reporter  
39 strain. *Nature genetics*, **21**, 70-71.
- 40 49. Casola, S. (2010) Mouse models for miRNA expression: the ROSA26 locus. *Methods*  
41 *in molecular biology*, **667**, 145-163.
- 42 50. Tasic, B., Hippenmeyer, S., Wang, C., Gamboa, M., Zong, H., Chen-Tsai, Y. and Luo, L.  
43 (2011) Site-specific integrase-mediated transgenesis in mice via pronuclear  
44 injection. *Proceedings of the National Academy of Sciences of the United States of*  
45 *America*, **108**, 7902-7907.
- 46 51. Gaidukov, L., Wroblewska, L., Teague, B., Nelson, T., Zhang, X., Liu, Y., Jagtap, K.,  
47 Mamo, S., Tseng, W.A., Lowe, A. *et al.* (2018) A multi-landing pad DNA integration  
48 platform for mammalian cell engineering. *Nucleic acids research*, **46**, 4072-4086.



- 1 52. Deans, T.L., Singh, A., Gibson, M. and Elisseeff, J.H. (2012) Regulating synthetic  
2 gene networks in 3D materials. *Proceedings of the National Academy of Sciences of*  
3 *the United States of America*, **109**, 15217-15222.
- 4 53. Singh, A., Deans, T.L. and Elisseeff, J.H. (2013) Photomodulation of Cellular Gene  
5 Expression in Hydrogels. *Acs Macro Letters*, **2**, 269-272.
- 6 54. Yun, J.J., Heisler, L.E., Hwang, H., Wilkins, O., Lau, S.K., Hycrca, M., Jayabalasingham,  
7 B., Jin, J., McLaurin, J., Tsao, M.S. *et al.* (2006) Genomic DNA functions as a universal  
8 external standard in quantitative real-time PCR. *Nucleic acids research*, **34**, e85.
- 9 55. Zhang, L., Jia, R., Palange, N.J., Satheka, A.C., Togo, J., An, Y., Humphrey, M., Ban, L.,  
10 Ji, Y., Jin, H. *et al.* (2015) Large genomic fragment deletions and insertions in mouse  
11 using CRISPR/Cas9. *PloS one*, **10**, e0120396.
- 12 56. Sawatsubashi, S., Joko, Y., Fukumoto, S., Matsumoto, T. and Sugano, S.S. (2018)  
13 Development of versatile non-homologous end joining-based knock-in module for  
14 genome editing. *Sci Rep*, **8**, 593.
- 15 57. Zhang, X.H., Tee, L.Y., Wang, X.G., Huang, Q.S. and Yang, S.H. (2015) Off-target  
16 Effects in CRISPR/Cas9-mediated Genome Engineering. *Mol Ther Nucleic Acids*, **4**,  
17 e264.
- 18 58. Kim, S., Kim, D., Cho, S.W., Kim, J. and Kim, J.S. (2014) Highly efficient RNA-guided  
19 genome editing in human cells via delivery of purified Cas9 ribonucleoproteins.  
20 *Genome Res*, **24**, 1012-1019.
- 21 59. Peng, R., Lin, G. and Li, J. (2016) Potential pitfalls of CRISPR/Cas9-mediated  
22 genome editing. *FEBS J*, **283**, 1218-1231.
- 23 60. Brooks, A.R., Harkins, R.N., Wang, P., Qian, H.S., Liu, P. and Rubanyi, G.M. (2004)  
24 Transcriptional silencing is associated with extensive methylation of the CMV  
25 promoter following adenoviral gene delivery to muscle. *J Gene Med*, **6**, 395-404.
- 26 61. Tycko, B. (2000) Epigenetic gene silencing in cancer. *The Journal of clinical*  
27 *investigation*, **105**, 401-407.
- 28 62. Wolffe, A.P. and Matzke, M.A. (1999) Epigenetics: regulation through repression.  
29 *Science*, **286**, 481-486.
- 30 63. Bird, A. (2002) DNA methylation patterns and epigenetic memory. *Genes &*  
31 *development*, **16**, 6-21.
- 32 64. Shalginikh, N., Poleshko, A., Skalka, A.M. and Katz, R.A. (2013) Retroviral DNA  
33 methylation and epigenetic repression are mediated by the antiviral host protein  
34 Daxx. *J Virol*, **87**, 2137-2150.
- 35 65. Lubbert, M. (2000) DNA methylation inhibitors in the treatment of leukemias,  
36 myelodysplastic syndromes and hemoglobinopathies: clinical results and possible  
37 mechanisms of action. *Curr Top Microbiol Immunol*, **249**, 135-164.
- 38 66. Stresemann, C. and Lyko, F. (2008) Modes of action of the DNA methyltransferase  
39 inhibitors azacytidine and decitabine. *Int J Cancer*, **123**, 8-13.
- 40 67. Mariani, M.R., Carpaneto, E.M., Ulivi, M., Allfrey, V.G. and Boffa, L.C. (2003)  
41 Correlation between butyrate-induced histone hyperacetylation turn-over and c-  
42 myc expression. *J Steroid Biochem Mol Biol*, **86**, 167-171.
- 43 68. Davie, J.R. (2003) Inhibition of histone deacetylase activity by butyrate. *J Nutr*,  
44 **133**, 2485S-2493S.
- 45 69. Eberharter, A. and Becker, P.B. (2002) Histone acetylation: a switch between  
46 repressive and permissive chromatin. Second in review series on chromatin  
47 dynamics. *EMBO reports*, **3**, 224-229.
- 48 70. Perrimon, N., Pitsouli, C. and Shilo, B.Z. (2012) Signaling mechanisms controlling  
49 cell fate and embryonic patterning. *Cold Spring Harb Perspect Biol*, **4**, a005975.

1  
2  
3

## FIGURES AND LEGENDS

### A. Wild type allele

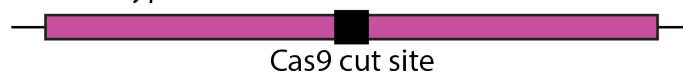

### B. Repair DNA

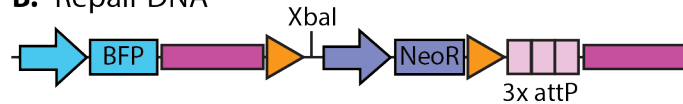

### C. Engineered allele

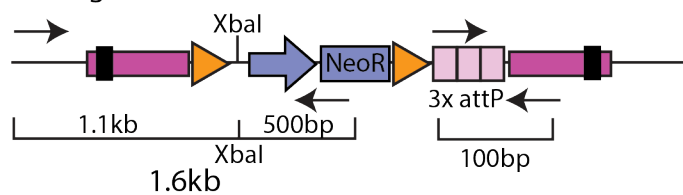

### D. Genomic edited site

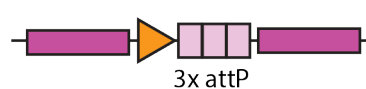

### E. Quantitative PCR screen

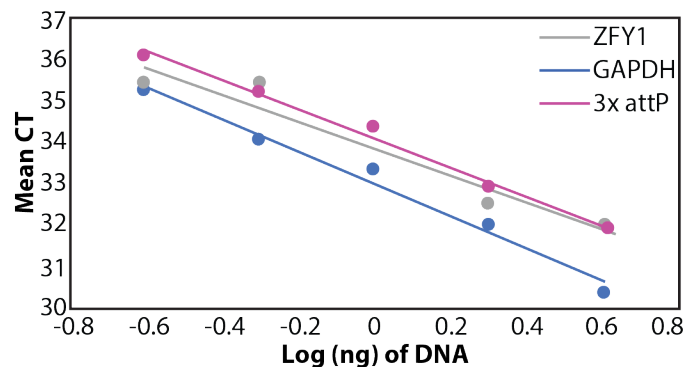

4  
5  
6

### Figure 1: Approach for inserting docking sites into mouse pluripotent stem cells. A.

7 Wild type *Rosa26* allele (dark pink) with the Cas9 cut site (black square). B. Engineered repair  
8 DNA with 3x attP docking sites (light pink squares). Neomycin resistance (purple module)  
9 flanked by FRT sites (orange triangles) were added to enable G418 selection of the genomic  
10 insertion of the docking sites. Blue fluorescence protein (BFP, blue module) was added  
11 outside of the homology arms to screen for off-target, random integration of the repair DNA.  
12 C. The engineered *Rosa26* allele with the repair DNA successfully inserted into the genome.  
13 The PCR screen to confirm integration into the *Rosa26* locus is shown with two sets of primers  
14 (arrows). Confirmation of the NeoR module flanked by FRT sites produces a 1.6kb amplicon  
15 and confirmation of the 3x attP sites produces a 100bp amplicon. D. Schematic of the genomic  
16 edited site in ES clones with confirmed attP docking sites in the *Rosa26* locus after transfection  
17 with flp recombinase to remove the neomycin resistance gene. E. Quantitative PCR on ZFY1  
18 (grey), GAPDH (blue), and the targeted *Rosa26* allele with 3x attP sites (pink).

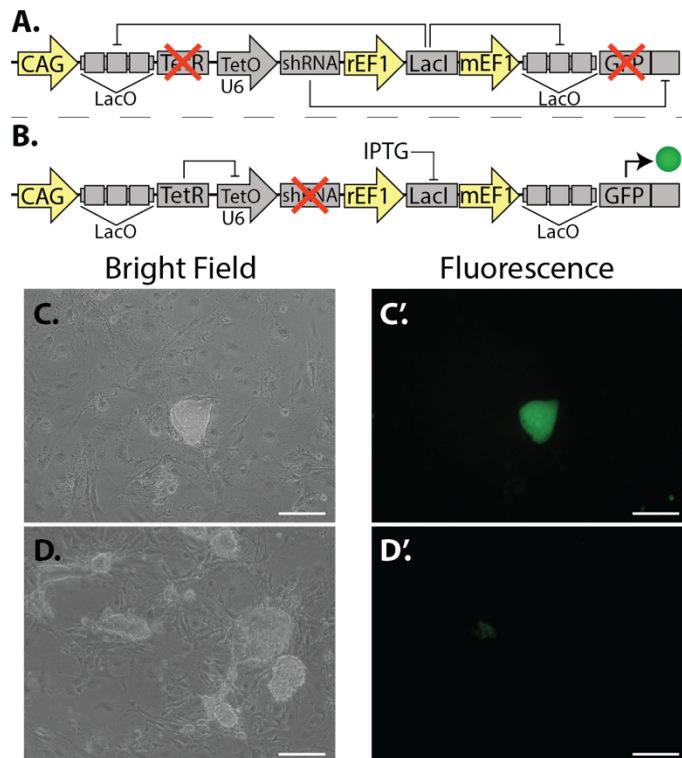

1

2

3

4

5

6

7

8

9

10

11

12

13

14

15

16

17

18

19

20

21

**Figure 2: Integrating mLTRi\_EGFP into the Rosa26 locus.** **A.** Schematic of mLTRi in the off state: LacI repressor proteins are constitutively expressed and bind to the lac operator sites upstream of TetR and GFP. This causes transcriptional repression of TetR and GFP. With the repression of TetR, shRNA is transcribed by the U6 promoter and complementarily binds to the synthetic target sequence located in the 3'UTR of the GFP mRNA. **B.** Schematic of mLTRi in the on state: in the induced state, IPTG binds to the LacI proteins, producing a conformational change in the repressor proteins. This causes them to no longer bind to the lac operator sites, which allows for the transcription of GFP and TetR. The Tet repressor proteins bind to the tet operator site located in the U6 promoter, repressing the transcription of the shRNA. The resulting effect is a robust expression of GFP. **C.** Bright field image of stably integrated mLTRi into the Rosa26 locus of mouse ES cells 7 days after selection with G418. **C'** The presence of 250 $\mu$ M IPTG in the culture media induces robust expression of EGFP 7 days after G418 selection. **D.** Bright field image of stably integrated mLTRi 30 days after selection with G418. **D'** Fluorescence image of stably integrated mLTRi 30 days after selection with G418. Scale bars, 200 $\mu$ m.

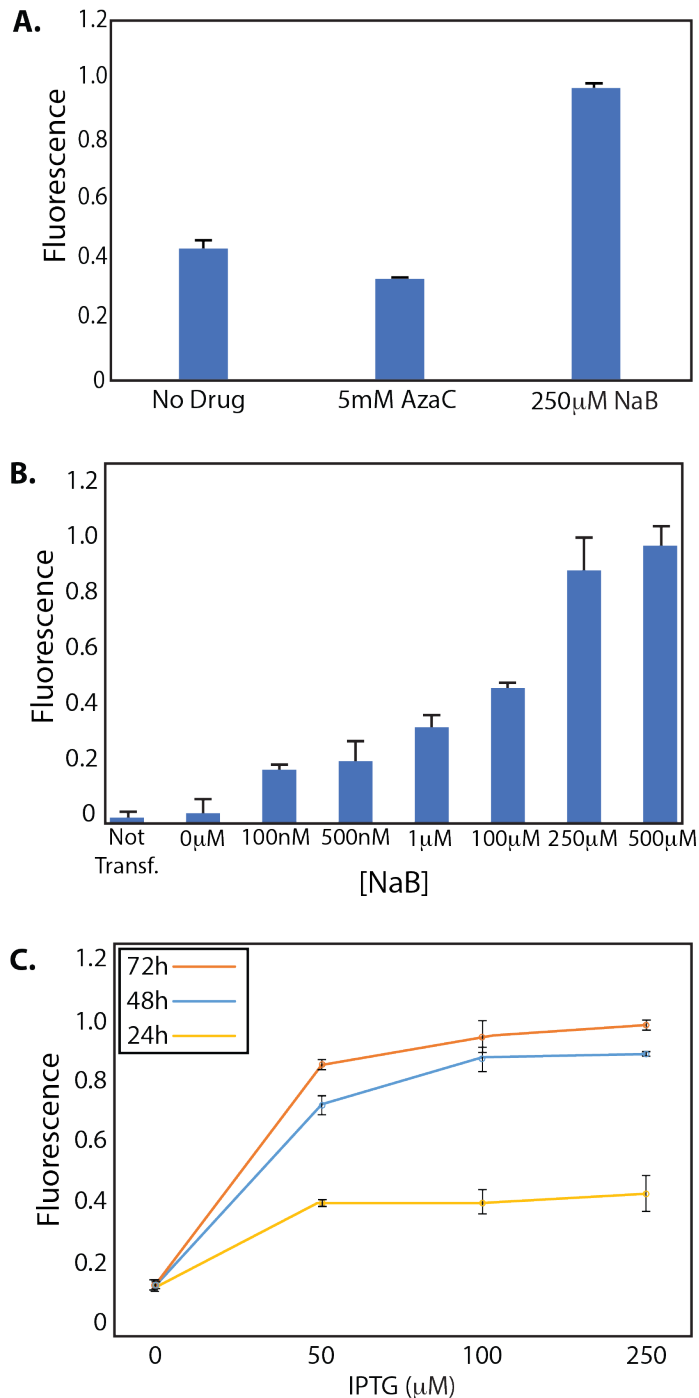

1  
2

3 **Figure 3: Quantification of EGFP expression after re-activation of the silenced gene**  
4 **circuit. A.** Silenced ES colonies with mLTRi\_EGFP integrated into the Rosa26 locus that  
5 stopped expressing EGFP in the presence of IPTG after weeks of culturing were exposed to  
6 either 5-aza-deoxycytidine (AzaC) or sodium butyrate (NaB) with 250µM IPTG in the media  
7 of each condition. EGFP expression was assessed after 48 hours of exposure to AzaC or  
8 NaB in the media using flow cytometry and the median expression levels were quantified. **B.**  
9 Median EGFP fluorescence of cells after 48 hours of growing with 250µM IPTG in the media  
10 and increasing concentrations of NaB. **C.** Median EGFP expression of recovered switching  
11 dynamics. Cultures were maintained with 250µM NaB and varying concentrations of IPTG  
12 over 24 hours (yellow), 48 hours (blue), and 72 hours (orange). In all experiments, each data

1 point represents the median EGFP expression in at least three independent experiments.  
2 The error bars represent the standard deviation between these experiments. EGFP  
3 expression was normalized to the maximum expression in each experiment.

4

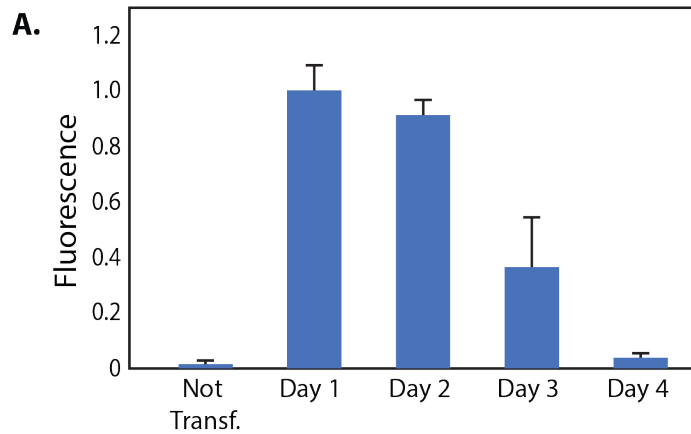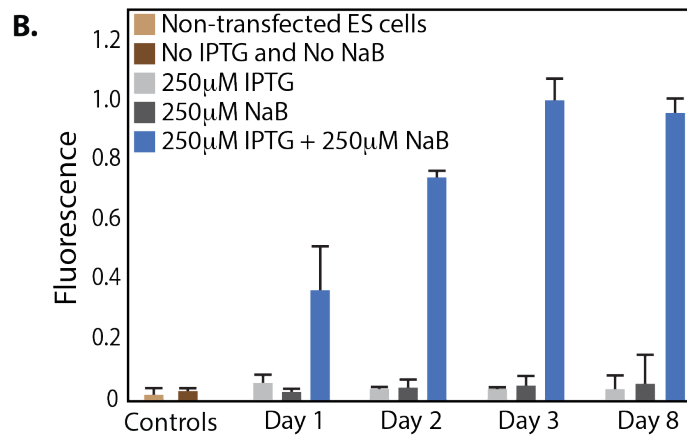

5

6 **Figure 4: Re-activation of EGFP expression in stable ES colonies.** **A.** Silenced ES cells  
7 with mLTRi\_EGFP stably integrated into the Rosa26 locus and not responding to IPTG  
8 induction were grown in 250µM NaB for 48 hours then the NaB was removed. One day (Day  
9 1), two days (Day 2), three days (Day 3) and four days (Day 4) after removal of the NaB,  
10 250µM of IPTG was added to the media and EGFP expression was assessed using flow  
11 cytometry 24 hours after the addition of IPTG. EGFP fluorescence was normalized to the max  
12 expression, here the Day 1 data. Each data point represents the median EGFP expression in  
13 at least three independent experiments. The error bars represent the standard deviation  
14 between these experiments. **B.** ES cells with LTRi\_EGFP stably integrate into the Rosa26  
15 locus were grown in various conditions: light grey: 250µM IPTG, dark grey: 250µM NaB and  
16 blue: 250µM IPTG + 250µM NaB for up to 8 days. The light brown are non-transfected ES  
17 cells and the dark brown are ES cells with mLTRi\_EGFP stably integrated into the Rosa26  
18 locus with no IPTG or NaB added to the media. Each data point represents the median EGFP  
19 expression in at least three independent experiments. The error bars represent the standard  
20 deviation between these experiments. EGFP expression was normalized to the maximum  
21 expression.

22

1 **Supplementary Information for**

2

3 **Rosa26 docking sites for investigating genetic circuit silencing in stem cells**

4

5 Michael Fitzgerald\*, Mark Livingston\*, Chelsea Gibbs, and Tara Deans<sup>†</sup>

6 Department of Biomedical Engineering, University of Utah, Salt Lake City, UT 84112

7

8 \*These authors contributed equally to this to this work

9

10

11 <sup>†</sup>Correspondence: Tara L. Deans, Department of Biomedical Engineering, University of Utah,  
12 Salt Lake City, Utah 84112, USA

13

14 **E-mail address:** [tara.deans@utah.edu](mailto:tara.deans@utah.edu)

15

16 **Tel:** 801-585-7859

17



### A. Engineered allele

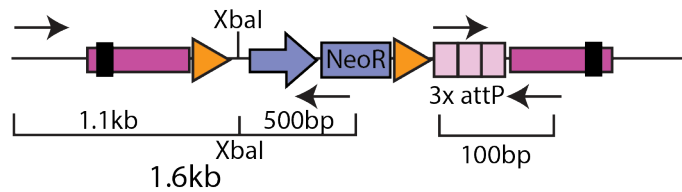

### B.

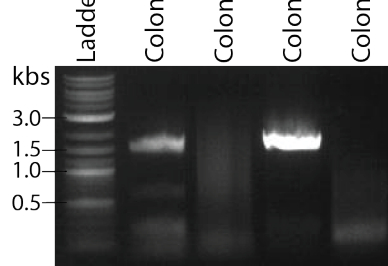

### C.

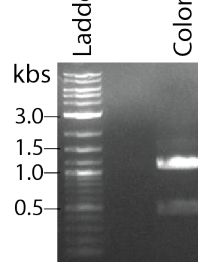

### D. Genomic edited site

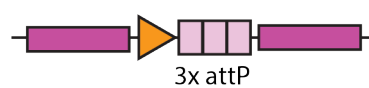

### E.

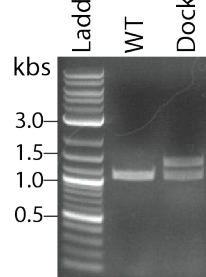

### F. Sequencing file

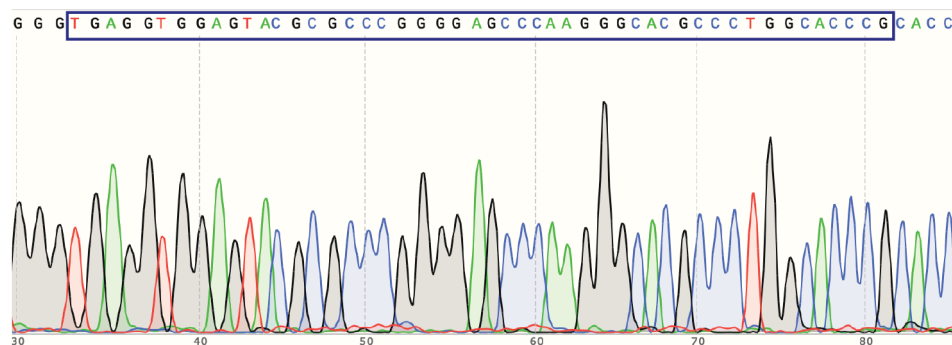

1

2 **Supplemental Figure S1: Screening for docking site integration.** A. Schematic of PCR  
 3 screen to confirm integration into the Rosa26 locus. Correct integration yields an expected  
 4 amplicon size of 1.6kb. B. PCR on the genomic DNA of four different ES colonies. C. Colony  
 5 3 amplicon was gel isolated and cut with XbaI to confirm integration of the repair DNA. D.  
 6 Schematic of the genomic edited site in ES clones with confirmed attP docking sites in the  
 7 Rosa26 locus after transfection with flp recombinase to remove the neomycin resistance gene.  
 8 E. PCR comparing the wild time (WT) ES cells without the docking site and with a confirmed  
 9 ES colony harboring the 3x attP docking site. F. Sanger sequencing of the attB site (sequence  
 10 in box).

11

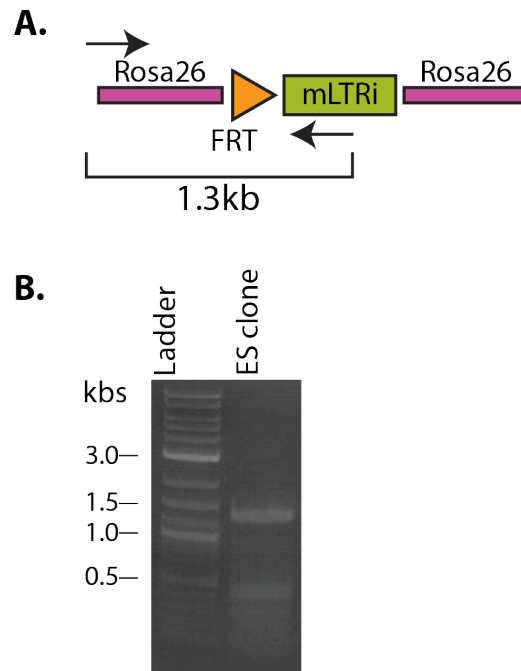

1

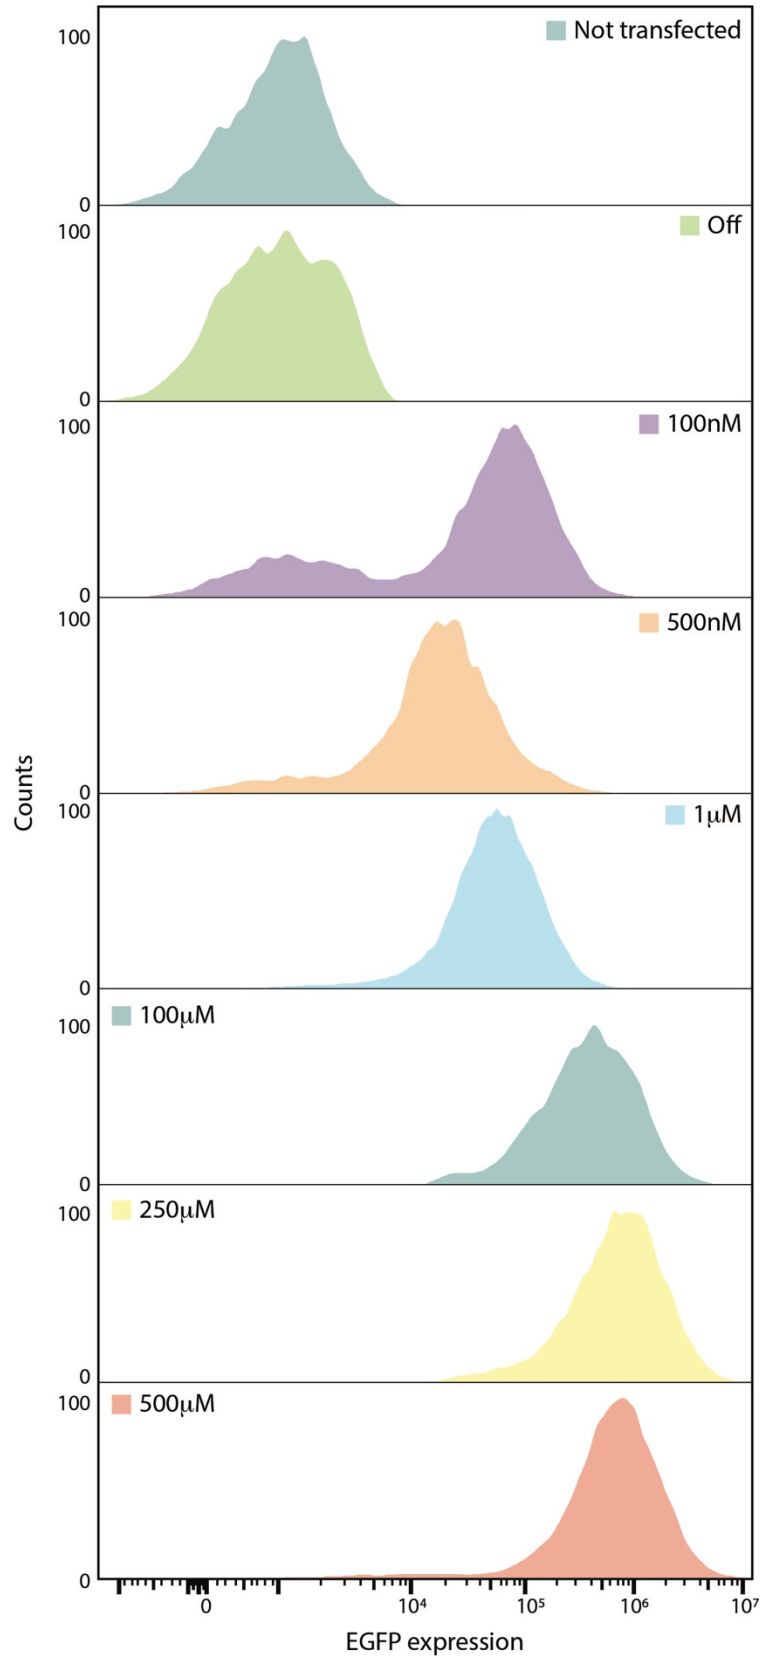

1 **Supplemental Figure S3: Cell population effects with varying amounts of NaB.**  
2 Silenced ES cells with mLTRi\_EGFP integrated into the Rosa26 locus that stopped  
3 expressing EGFP in the presence of IPTG after weeks of culturing were exposed to 250 $\mu$ M  
4 IPTG and varying amounts of NaB (shown in the figure) for 48 hours. After 48 hours, each  
5 population was run on flow cytometry to quantify EGFP and to assess the cell population  
6 shifts in the presence of IPTG and NaB.  
7  
8  
9

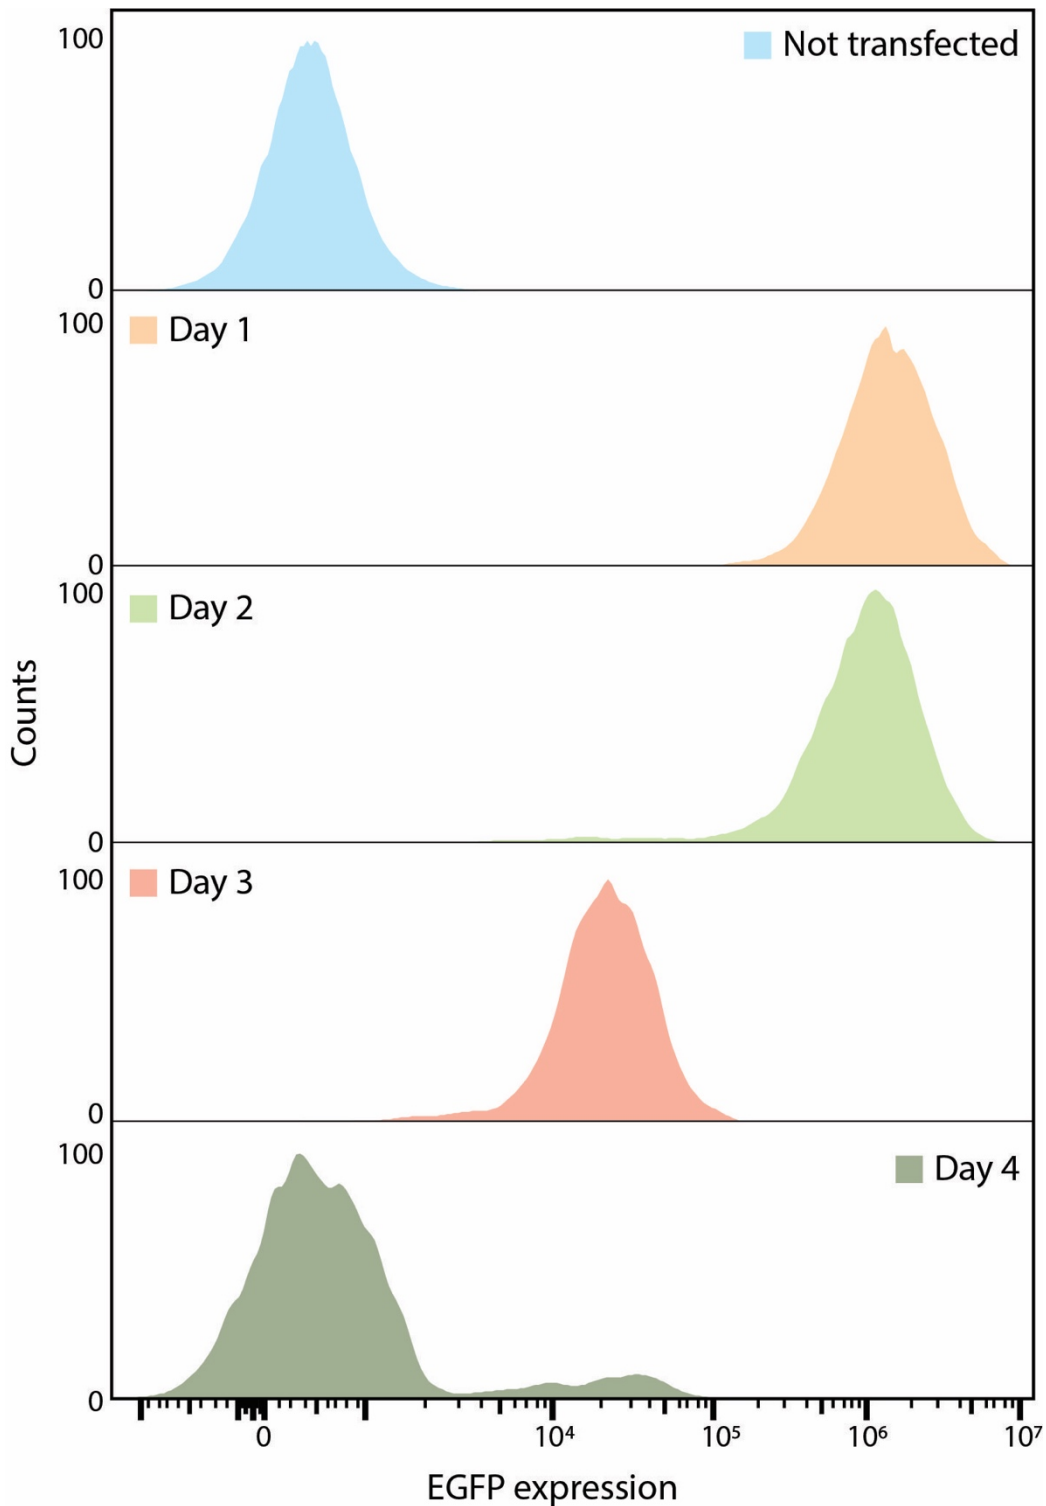

1  
2  
3  
4  
5  
6  
7  
8  
9  
10  
11

**Supplemental Figure S4: Cell population effects re-activating EGFP after removal of NaB.** Silenced ES cells with mLTRi\_EGFP integrated into the Rosa26 locus that stopped expressing EGFP in the presence of IPTG after weeks of culturing were grown in 250 $\mu$ M NaB for 48 hours then the NaB was removed. One day (Day 1), two days (Day 2), three days (Day 3) and four days (Day 4) after removal of the NaB, 250 $\mu$ M of IPTG was added to the media and EGFP expression was assessed using flow cytometry 24 hours after the addition of IPTG.

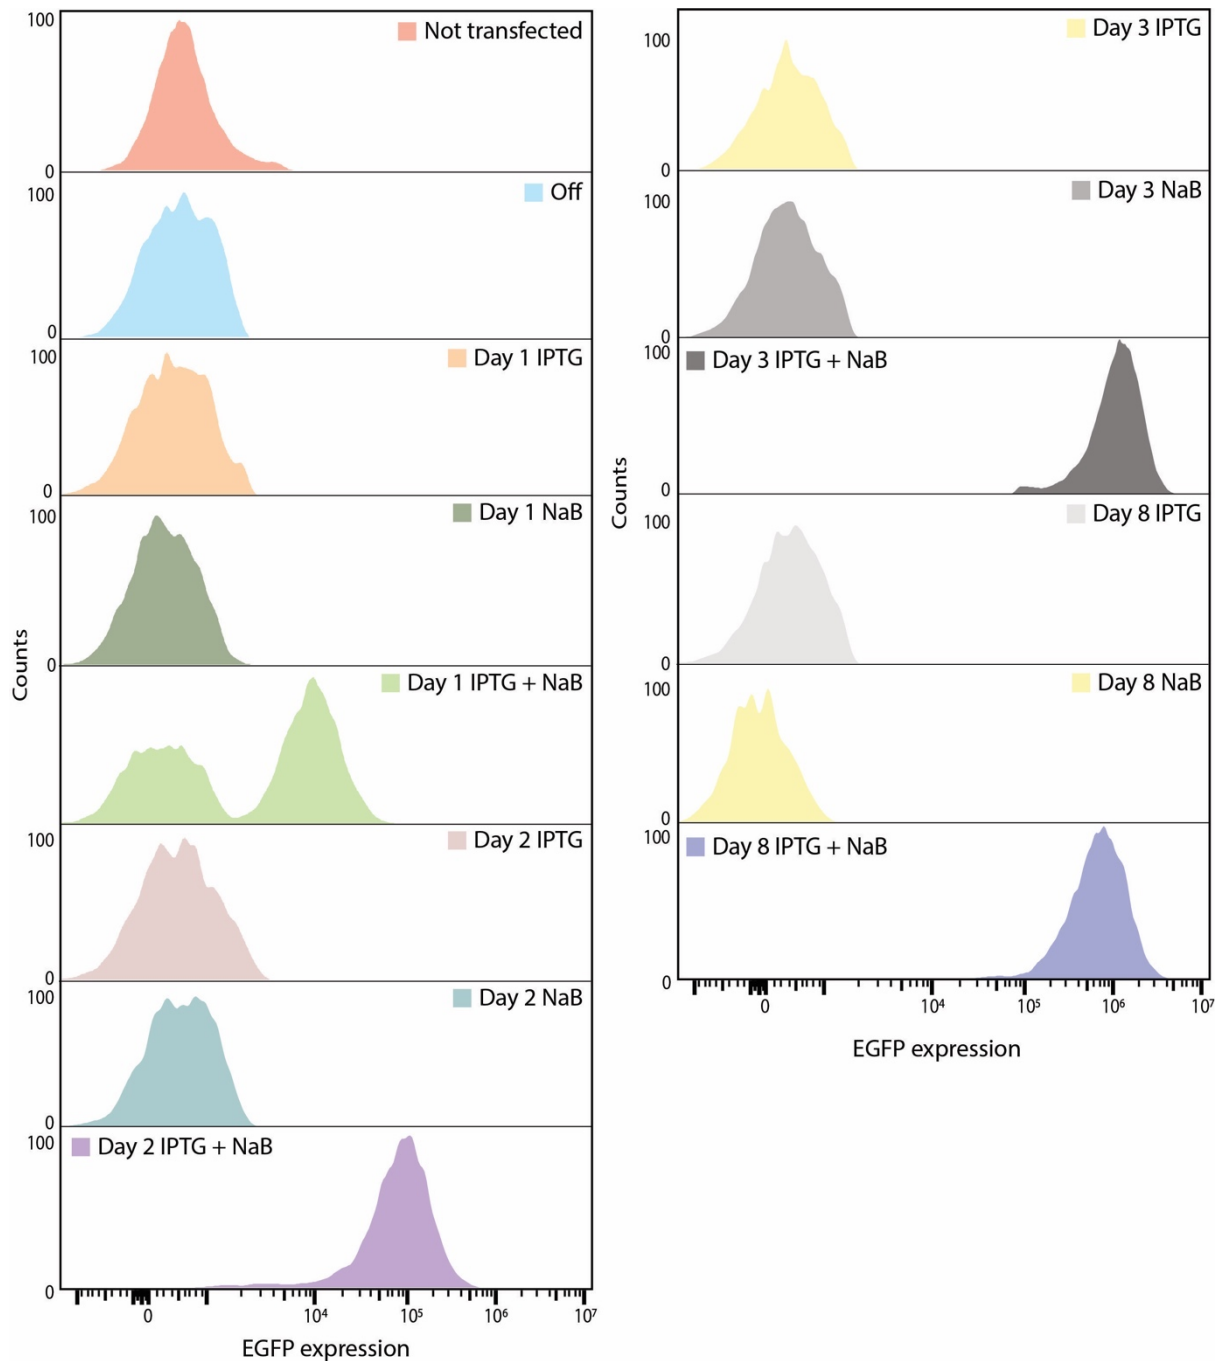

1  
2

3 **Supplemental Figure S5: Cell population effects investigating the impact of NaB on**  
4 **cells.** Silenced ES cells with LTRi\_EGFP stably integrate into the Rosa26 locus that stopped  
5 expressing EGFP in the presence of IPTG after weeks of culturing were grown in various  
6 conditions as indicated in the figure for up to 8 days.

7



| Area to amplify   | Forward primer                                                                  | Reverse Primer                                                          | Size of amplicon | Type of PCR  |
|-------------------|---------------------------------------------------------------------------------|-------------------------------------------------------------------------|------------------|--------------|
| GAPDH             | GCCAATACGGC<br>CAAATCT                                                          | CACCTATGGTGCAACAGT<br>ATTCC                                             | 125              | qPCR         |
| ZFY1              | AGCTTGACCTGC<br>AAAGGAAGA                                                       | GCCAATACGGCCAAATC<br>T                                                  | 137              | qPCR         |
| 3x attP           | CCGAAAACGAT<br>ATCCTTACGACC                                                     | CTTCCCTCGTGATCTGCAA<br>CT                                               | 70               | qPCR         |
| Screening Primers | CGTGTAGAATGC<br>CATGAGTCAAGC                                                    | CGCCTTCTTGACGAGTTCT<br>TCTGAG                                           | 1646             | Conventional |
| TetR              | CACCGCTAATTC<br>AAAGCAACCGG<br>TGATATCTCCTC<br>TAGAGTCGACCT<br>GCAGG            | GTATCTTATCATGTCTGGC<br>CAGCTCAAGTTCTGCTTTA<br>ATAAGATCTGAATTC           | 1440             | Gibson       |
| REF1              | CAGATCTTATTA<br>AAGCAGAACTT<br>GAGCTGGCCAG<br>ACATGATAAGAT<br>AC                | CGTATAACGTTACTGGTTT<br>CATGGTGGCGTTGCTTT<br>GAATTAGCGGTGGCTTTC<br>ACAAC | 2801             | Gibson       |
| MEF               | CGTCACGTGGT<br>GCGTTTTGCCTC<br>GAGAACCATGG<br>ACCTGCAGGGC<br>CTGAAATAAC         | CTGCAGGTCGACTCTAGA<br>GGAGATATCACCGGTTGC<br>TTTGAATTAG                  | 1566             | Gibson       |
| Lacl              | GTTGTGAAAGCC<br>ACCGTAATTCA<br>AAGCAACCGCC<br>ACCATGAAACCA<br>GTAACGTTATAC<br>G | GCACGTTTTGTGTCATTGG<br>GGAAACCTGCTCTCAAAC<br>CTTCCTTCTTCTTAGGA<br>GGCC  | 1188             | Gibson       |
| IRES              | GGCCTCCTAAGA<br>AGAAGAGGAAG<br>GTTTGAGAGCA                                      | CTGTGAGGACTGAGGGG<br>CCTGAAATGAGCCCAGCT<br>TTCTATGCAACCCAAGGA<br>C      | 2018             | Gibson       |

|                    |                                                                     |                                                             |      |        |
|--------------------|---------------------------------------------------------------------|-------------------------------------------------------------|------|--------|
|                    | GGTTTCCCAAT<br>GACACAAAACG                                          |                                                             |      |        |
| RNAi               | CTGAGTCCTGG<br>GTTGCATAGAAA<br>GCTGGGCTCATT<br>TCAGGCCCTCA<br>G     | GTTATTTAGGCCCTGCA<br>GGTCCATGGTTCTCGAGG<br>CAAAACGCACCACGTG | 1056 | Gibson |
| TRZ                | CGGACCGGTAG<br>CTAGCATCCGGA<br>AAGATCTCTGTA<br>CAAGTAAAGCG<br>GCCGC | CGCCAATACTCATGATTC<br>TCGAGCGCGTTGGCCGAT<br>TCATTAATG       | 404  | Gibson |
| Amp Origin         | AACGCGCTCGA<br>GAATCATGAGTA<br>TTGGGCGCTCTT<br>CCGC                 | CAATAATCAATGTCGACA<br>CCACGTGACGAAAGGGCC<br>TCGTGATAC       | 2005 | Gibson |
| Intron<br>w/LacO   | CTCTGCTAACCA<br>TGCCTACAGAGA<br>TTTAAAGCTCTA<br>AGG                 | GAGATCTTTCCGGATGCT<br>AGCTACCGGTCCGCAAGC<br>TTGGTTGGAATC    | 447  | Gibson |
| Bactin<br>Promoter | CTTTCGTCACGT<br>GGTGTGACATT<br>GATTATTGACTA<br>G                    | CTTTAAATCTCTGTAGGCA<br>TGGTTAGCAGAGGCTC                     | 1630 | Gibson |
| Genome 1           | TTTGAACAAGA<br>GTCCGTCTCCAC<br>CGGACGCGGCC<br>ATGG                  | CCTGGTTTATGCCTTCTAG<br>AAAGACTGGAGTTGCAGA<br>TCACGAGGG      | 943  | Gibson |
| Azurite            | GGTGGTTCCTTT<br>TGGAATGCCTCG<br>AGCTCATGACCA<br>AAATCCCTTAAC        | TGGCCGCGTCCGGTGGAG<br>ACGGACTCTTGTCCAAC<br>TGG              | 2450 | Gibson |
| RF                 | TCTGCAACTCCA<br>GTCTTTCTAGAA<br>GGCATAAACCA<br>GGTCGTAAGGA<br>TATC  | CCAGGTTAGCCTTTAAGC<br>CGTCGAGGCCGCGAAGTT<br>CCTATAC         | 2161 | Gibson |

1

|          |                                           |                                        |     |        |
|----------|-------------------------------------------|----------------------------------------|-----|--------|
| Genome 2 | GCCTCGACGGCT<br>TAAAGGCTAACC<br>TGGTGTGTG | AGCTCGAGGCATTCCAAA<br>AGGAACCACCTTTTAC | 980 | Gibson |
|----------|-------------------------------------------|----------------------------------------|-----|--------|

2

3

4 **Table S1: Table of primers used in the study.**

5

6

|    |                                |                |      |    |              |
|----|--------------------------------|----------------|------|----|--------------|
| 1  | <b>Features in mLTRi_EGFP:</b> |                |      |    |              |
| 2  | Poly A                         | 178..227       | 50   | == | misc_feature |
| 3  | LacO                           | 322..344       | 23   | <= | misc_binding |
| 4  | T7                             | 664..691       | 28   | => | primer_bind  |
| 5  | TRZ                            | 708..726       | 19   | == | misc_feature |
| 6  | TRZ                            | 736..754       | 19   | <= | misc_feature |
| 7  | U6 promoter                    | 756..1050      | 295  | <= | misc_feature |
| 8  | CMV enhancer                   | 1061..1418     | 358  | == | misc_feature |
| 9  | b-actin promoter               | 1419..2659     | 1241 | == | misc_feature |
| 10 | b-actin promoter               | 2660..2662     | 3    | == | misc_feature |
| 11 | Intron w/LacO                  | 2707..3125     | 419  | == | misc_feature |
| 12 | EGFP                           | 3177..3891     | 715  | == | misc_feature |
| 13 | EGFP                           | 3892..3893     | 2    | == | misc_feature |
| 14 | TRZ                            | 4007..4025     | 19   | == | misc_feature |
| 15 | Poly A                         | 4038..4087     | 50   | == | misc_feature |
| 16 | M13-rev                        | 4102..4122     | 21   | <= | primer_bind  |
| 17 | AttB Site                      | 4653..4706     | 54   | <= | misc_feature |
| 18 | LacO                           | 4988..5010     | 23   | <= | misc_binding |
| 19 | sv40 enhancer                  | 5044..5285     | 242  | == | misc_feature |
| 20 | sv40 enhancer                  | 5044..5072     | 29   | == | misc_feature |
| 21 | sv40 enhancer                  | 5073..5285     | 213  | == | misc_feature |
| 22 | MEF1 promoter                  | 5286..6609     | 1324 | == | misc_feature |
| 23 | Intron w/LacO                  | 6682..7100     | 419  | == | misc_feature |
| 24 | TetR                           | 7335..7991     | 657  | == | misc_feature |
| 25 | TetR                           | 7335..7973     | 639  | == | misc_feature |
| 26 | TetR                           | 7974..7978     | 5    | == | misc_feature |
| 27 | TetR                           | 7979..7991     | 13   | == | misc_feature |
| 28 | SV40 late polyA                | 8040..8231     | 192  | == | polyA_signal |
| 29 | PMBI Ori                       | 8265..9011     | 747  | == | misc_feature |
| 30 | CMV Enhancer                   | 9018..9430     | 413  | == | misc_feature |
| 31 | REF1 promoter                  | 9431..10,719   | 1289 | == | misc_feature |
| 32 | LacI                           | 10,758..11,876 | 1119 | == | misc_feature |
| 33 | fmdv IRES                      | 11,878..12,346 | 469  | == | misc_feature |
| 34 | EM7 promoter                   | 12,347..12,420 | 74   | == | misc_feature |
| 35 | Neomycin/kan                   | 12,421..13,215 | 795  | == | misc_feature |
| 36 | EF1 PolyA                      | 13,262..13,835 | 574  | == | misc_feature |
| 37 |                                |                |      |    |              |
| 38 |                                |                |      |    |              |
| 39 |                                |                |      |    |              |
| 40 |                                |                |      |    |              |
| 41 |                                |                |      |    |              |
| 42 |                                |                |      |    |              |

## 1 Map of mLTRi\_eGFP:

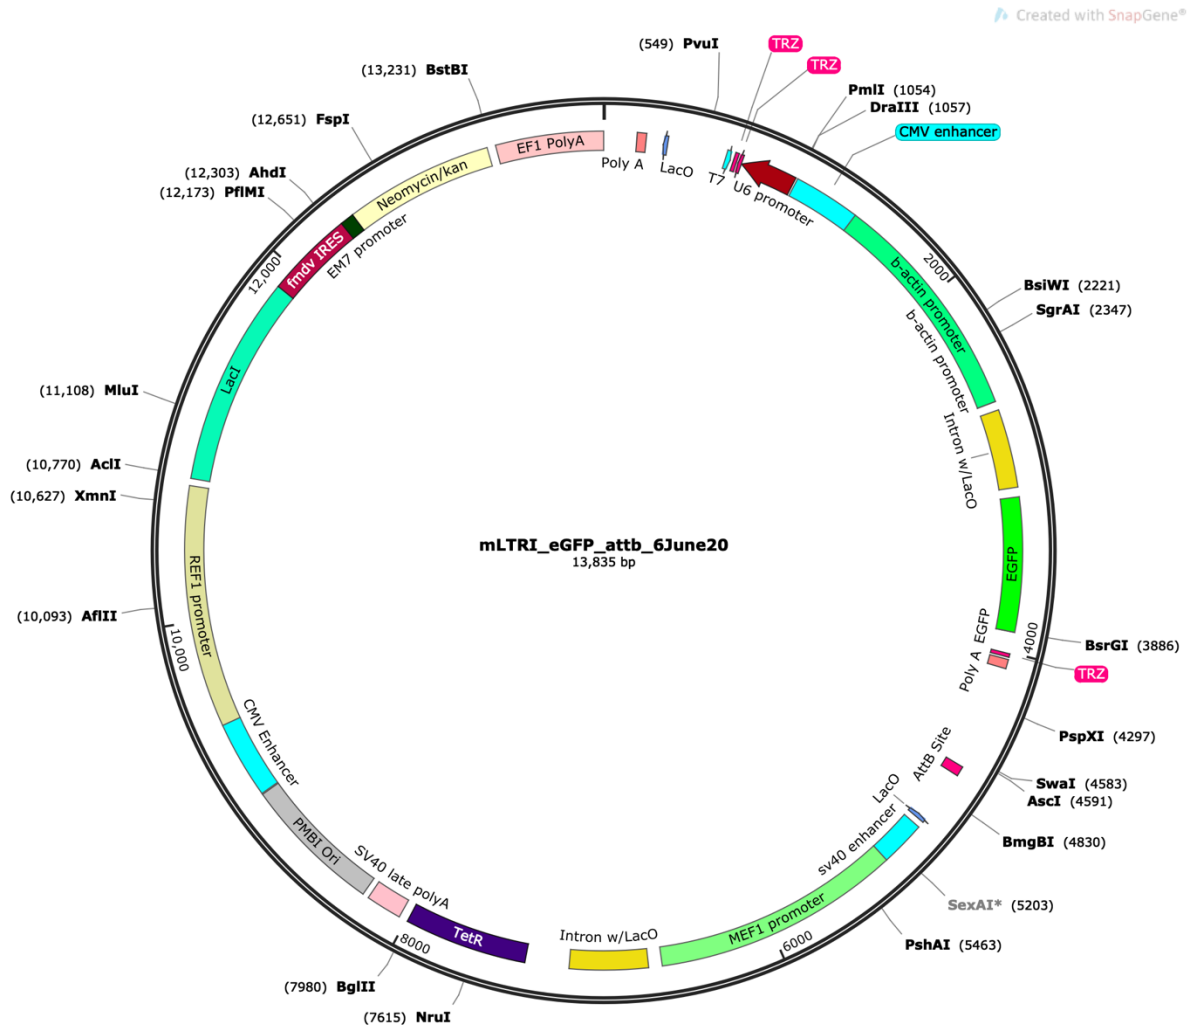

2

1  
2 GGCTCATTTTCAGGCCCTCAGTCCTCACAGTCTGTTTCATGATCATAATCAGCCATACCA  
3 CATTGTAGAGGTTTTACTTGTCTTTAAAAAACCTCCCACACCTCCCCCTGAACCTGAAAC  
4 AAAAAATGAATGCAATTGTTGTTGTTAACTTGTATTGTCAGCTTATAATGGTTACAAATA  
5 AAGCAATAGCATCACAAATTTACAAATAAAGCATTTTTTTTCACTGCATTCTAGTTGTGGT  
6 TTGTCCAAACTCATCAATGTATCTTATCATGTCTGGGCCCAAGCTTGGCGTAATCATGGT  
7 CATAGCTGTTTCCTGTGTGAAATTGTTATCCGCTCACAATTCACACAACATACGAGCC  
8 GGAAGCATAAAGTGTAAGCCTGGGGTGCCTAATGAGTGAGCTAACTCACATTAATTGC  
9 GTTGCCTCACTGCCCGCTTTCCAGTCGGGAAACCTGTCGTGCCAGCTGCATTAATGA  
10 ATCGGCCAACGCGCGGGGAGAGGCGGTTTGCCTATTGGGCGCTCTTCCGCTGCAACT  
11 GTTGGGAAGGGCGATCGGTGCGGGCCTCTTCGCTATTACGCCAGCTGGCGAAAGGGG  
12 GATGTGCTGCAAGGCGATTAAGTTGGGTAACGCCAGGGTTTTCCAGTCACGACGTTG  
13 TAAAACGACGGCCAGTGAATTGTAATACGACTCACTATAGGGCGAATTGGGCCTTTTTTC  
14 TACACAAATCAGCGATTTTCTCTTGAAAAATCGCTGATTTGTGTAGCGGTGTTTCGTCT  
15 TTCCACAAGATATATAACTCTATCAATGATAGAGTACTTTCAAGTTACGGTAAGCATATG  
16 ATAGTCCATTTTAAAACATAATTTTAAAACACTGCAAACACTACCCAAGAAATTATTACTTTCTA  
17 CGTCACGATTTTTGACTAATATCTTTGTGTTTACAGTCAAATTAATTCTAATTATCTCTCT  
18 AACAGCCTTGTATCGTATATGCAAATATGAAGGAATCATGGGAAATAGGCCCTCTTCT  
19 GCCCGACCTTGGCGCGCGCTCGGCGCGCGGTACGCTCCGTCACGTGGTGTGCGACAT  
20 TGATTATTGACTAGTTATTAATAGTAATCAATTACGGGGTCATTAGTTCATAGCCCATATA  
21 TGGAGTTCGCGTTACATAACTTACGGTAATGGCCCGCCTGGCTGACCGCCCAACGA  
22 CCCCCGCCATTGACGTCAATAATGACGTATGTTCCCATAGTAACGCCAATAGGGACTT  
23 TCCATTGACGTCAATGGGTGGACTATTTACGGTAAACTGCCCACTTGGCAGTACATCAA  
24 GTGTATCATATGCCAAGTACGCCCCCTATTGACGTCAATGACGGTAAATGGCCCGCCT  
25 GGCATTATGCCAGTACATGACCTTATGGGACTTTTCTACTTGGCAGTACATCTACGTA  
26 TTAGTCATCGCTATTACCATGGGTGCGAGGTGAGCCCCACGTTCTGCTTCACTCTCCCCA  
27 TCTCCCCCCCCCTCCCCACCCCAATTTTGTATTTATTTATTTTTTAATTATTTTGTGACG  
28 GATGGGGGCGGGGGGGGGGGGGGGGGCGCGCGCCAGGCGGGGCGGGGCGGGGGCGAG  
29 GGCGGGGCGGGGCGAGGCGGAGAGGTGCGGCGGCAGCCAATCAGAGCGGCGCGCT  
30 CCGAAAGTTTCTTTTATGGCGAGGCGGCGGGCGGCGGCCCTATAAAAAGCGAAG  
31 CGCGCGGCGGGGCGGGAGTTCGCTGCGTTGCTTCCGCCCCGTGCCCGCTCCGCGCCG  
32 CCTCGCGCCGCCCGCCCCGGCTCTGACTGACCGCGTTACTCCCACAGGTGAGCGGGC  
33 GGGACGGCCCTTCTCCTCCGGGCTGTAATTAGCGCTTGGTTAATGACGGCTCGTTTC  
34 TTTTCTGTGGCTGCGTGAAAGCCTTAAAGGGCTCCGGGAGGGCCCTTTGTGCGGGGG  
35 GAGCGGCTCGGGGGGTGCGTGCGTGTGTGTGGGGGAGCGGCTCGGGGGGTGCGT  
36 GCGTGTGTGTCGGCGCGGGGCTTTGTGCGCTCCGCAGTGTGCGCGAGGGGAGCGCG  
37 GCCGGGGGCGGTGCCCGCGGTGCGGGGGGGGCTGCGAGGGGAACAAAGGCTGCG  
38 TGCGGGGTGTGTGCGTGGGGGGGTGAGCAGGGGGTGTGGGCGCGTCCGTCGGGCT  
39 GCAACCCCCCTGCACCCCCCTCCCGAGTTGCTGAGCACGGCCCGGCTTCGGGTGC  
40 GGGGCTCCGTACGGGGCGTGGCGCGGGGCTCGCCGTGCCGGGCGGGGGGTGGCGG  
41 CAGGTGGGGGTGCCGGGCGGGGCGGGGCCGCTCGGGCCGGGGAGGGCTCGGGG  
42 GAGGGGCGCGGCGGCCCCCGGAGCGCCGGCGGCTGTGAGGGCGCGGCGAGCCGCA  
43 GCCATTGCCTTTTATGGTAATCGTGCGAGAGGGCGCAGGGACTTCTTTGTCCCAAATC  
44 TGTGCGGAGCCGAAATCTGGGAGGCGCCGCGCACCCCCCTAGCGGGGCGCGGGGC  
45 GAAGCGGTGCGGCGCCGGCAGGAAGGAAATGGGCGGGGAGGGCCTTCGTGCGTCCG  
46 CGCGCCGCGTCCCTTCTCCCTCTCCAGCCTCGGGGCTGTCCGCGGGGGGGACGG  
47 CTGCCTTCGGGGGGGACGGGGCAGGGCGGGGTTCCGGCTTCTGGCGTGTGACCGGCG  
48 GCCTAGAGCCTCTGCTAACCATGCCTACAGAGATTTAAAGCTCTAAGGTAATATAAAAT  
49 TTAGGTTGTGGAATTGTGAGCGCTCACAAATTCACAGTCGACCCTAGGTTGTGGAA  
50 TTCCACAGTCGACCCTAGTGTATAATGTGTTAAACTACGGATCCGTCTCCATTAGGCC  
51 TACAATGGTGAGACAAGTAGCCAACAGGGAAAGGGTTGCAAATATCATTTGGGCACACC  
52 TATGATAATATTGATGAAGCAGACAGTATTCAGCAAGTAACTGAGAGGTGGGAAGCTCA  
53 AAGCCAAAGTCTAATGTGCAGTCAGGTGAATTTATTGAAAAATTTGAGGCTCCTGGTG  
54 GTGCAAATCAAAGAACTGCTCCTCAGGGATCCTAATTGTTTGTGATTTTAGATTCCAAC

1 CAAGCTTGCGGACCGGTaGCTAGAGTCGACCTGCAGCACAAACCATGGTGAGCAAGGG  
2 CGAGGAGCTGTTACCGGGGTGGTGCCCATCCTGGTCGAGCTGGACGGCGACGTA  
3 CGGCCACAAGTTCAGCGTGTCCGGCGAGGGCGAGGGCGATGCCACCTACGGCAAGCT  
4 GACCCTGAAGTTCATCTGCACCACCGGCAAGCTGCCCGTGCCCTGGCCCACCCTCGT  
5 GACCACCCTGACCTACGGCGTGAGTGCTTCAGCCGCTACCCCGACCACATGAAGCA  
6 GCACGACTTCTTCAAGTCCGCCATGCCCGAAGGCTACGTCCAGGAGCGCACCATCTTC  
7 TTCAAGGACGACGGCAACTACAAGACCCGCGCCGAGGTGAAGTTCGAGGGCGACACC  
8 CTGGTGAACCGCATCGAGCTGAAGGGCATCGACTTCAAGGAGGACGGCAACATCCTG  
9 GGGCACAAGCTGGAGTACAACACAAGCCACAACGTCTATATCATGGCCGACAAGC  
10 AGAAGAACGGCATCAAGGTGAAGTTCAGATCCGCCACAACATCGAGGACGGCAGCGT  
11 GCAGCTCGCCGACCACTACCAGCAGAACACCCCCATCGGGCAGCGCCCGTGCTGCT  
12 GCCCGACAACCACTACCTGAGCACCCAGTCCGCCCTGAGCAAAGACCCCAACGAGAA  
13 GCGCGATCACATGGTCTGCTGGAGTTCGTGACCGCCGCCGGGATCACTCTCGGCAT  
14 GGACGAGCTGTACAAGTAAAGCGGCCGCGACTCTAGATCATAATCAGCCATACCACAT  
15 TTGTAGAGGTTTTACTTGCTTTAAAAAACCTCCCACACCTCCCCTGAACCTGAAACATA  
16 AAATGAATGCACTACACAAATCAGCGATTTTAAATGGTTACAAATAAAGCAATAGCATCAC  
17 AAATTTCAAAATAAAGCATTTTTTTCACTGCAAGCTTGGCGTAATCATGGTCATAGCTG  
18 TTTCTGTGTGAAATTGTTATCCGCTCACAATTCCACACAACATACGAGCCGGAAGCAT  
19 AAAGTGTAAAGCCTGGGGTGCCTAATGAGTGAGCTAACTCACATTAATTGCGTTGCGCT  
20 CACTGCCCGCTTCCAGTCGGGAAACCTGTGCTGCCAGCTGCATTAATGAATCGGCCA  
21 ACGCGCTcgagGGATCACTCTCGGCATGGACGAGCTTTACAAGTAAGAATTCTAGATAAC  
22 TGATCATAATCAGCCATACCACATTTGTAGAGGTTTTACTTGCTTTAAAAAACCTCCCAC  
23 ACCTCCCCTGAACCTGAAACATAAAATGAATGCAATTGTTGTTGTTAACTTGTTTATTG  
24 CAGCTTATAATGGTTACAAATAAAGCAATAGCATCACAAATTTCAAAATAAAGCATTTTT  
25 TTCCTGCACTTAGTTGTGGTTTGTCCAACTCATCAATGTATCTTATTTAAATTGGGC  
26 GCGCCCAACTAGTTCTAGAGCGGCCGCCACTCGACGATGTAGGTCACGGTCTCGAAG  
27 CCGCGGTGCGGGTGCCAGGGCGTGCCCTTGGGCTCCCCGGGCGCGTACTCCACCTC  
28 ACCCATCTGGTCCATCATGATGAACGGGTGAGGTGGCGGTAGTTGATCCCGGCGAAC  
29 GCGCGGCGCACCGGGAAGCCCTCGCCCTCGAAACCGCTGGGCGCGGTGGTCACGGT  
30 GAGCACGGGACGTGCGACGGCGTCCGGCGGGTGCAGGATACGCGGGGCAGCGTCAGCG  
31 GGTTCTCGACGGTCACGGCGGGCATGTGAGTGAGCTCCAGCTTTTGTCCCTTTAG  
32 TGAGGGTTAATTTGAGCTTGGCGTAATCATGGTCATAGCTGTTTCTGTGTGAAATTG  
33 TTATCCGCTCACAATTTCCACACAACATACGAGCCGGCTcgagaacctggACCTGCAGGGC  
34 CTGAAATAACCTCTGAAAGAGGAACTTGGTTAGGTACCTTCTGAGGCGGAAAGAACCA  
35 GCTGTGGAATGTGTGTCAGTTAGGGTGTGGAAAGTCCCAGGCTCCCAGCAGGCGAG  
36 AAGTATGCAAAGCATGCATCTCAATTAAGTACGCAACCAGGTGTGGAAAGTCCCAGGCT  
37 CCCCAGCAGGCAGAAGTATGCAAAGCATGCATCTCAATTAAGTACGCAACCATAGTCCCA  
38 CTAGTGGAGCCGAGAGTAATTCATACAAAAGGAGGGATCGCCTTCGCAAGGGGAGAGC  
39 CCAGGGACCGTCCCTAAATTCTCACAGACCCAAATCCCTGTAGCCGCCCCACGACAGC  
40 GCGAGGAGCATGCGCTCAGGGCTGAGCGCGGGGAGAGCAGAGCACACAAGCTCATA  
41 GACCCTGGTCTGTGGGGGGGAGGACCGGGGAGCTGGCGCGGGGCAAACCTGGGAAAGC  
42 GGTGTGCTGTGCTGGCTCCGCCCTCTCCCGAGGGTGGGGGAGAACGGTATATAAGT  
43 GCGGCAGTCGCTTGGACGTTCTTTTTCGCAACGGGTTTGCCGTCAGAACGCAGGTGA  
44 GGGGCGGGTGTGGCTTCCGCGGGCCGCCGAGCTGGAGGTCTGCTCCGAGCGGGCC  
45 GGGCCCCGCTGTCGTCGGCGGGGATTAGCTGCGAGCATTCCCGCTTCGAGTTGCGGG  
46 CGGCGCGGGAGGCAGAGTGCAGAGCCTAGCGGCAACCCCGTAGCCTCGCCTCGTGT  
47 CCGGCTTGAGGCCTAGCGTGGTGTCCGCGCCGCGCCGCGTACTCCGGCCGCA  
48 CTCTGGTCTTTTTTTTTTTTTGTTGTTGTTGCCCTGCTGCCTTCGATTGCCGTTACGCAAT  
49 AGGGGCTAACAAAGGGAGGGTGCGGGGCTTGCTCGCCCGGAGCCCGGAGAGGTCAT  
50 GGTTGGGGAGGAATGGAGGGACAGGAGTGGCGGCTGGGGCCCCGCCCTTCGGAG  
51 CACATGTCCGACGCCACCTGGATGGGGCGAGGCCTGGGGTTTTTCCCGAAGCAACCA  
52 GGCTGGGGTTAGCGTGCCGAGGCCATGTGGCCCCAGCACCCGGCACGATCTGGCTTG  
53 GCGGCGCCGCGTTGCCCTGCCTCCCTAACTAGGGTGAGGCCATCCCGTCCGGCACCA  
54 GTTGCCTGCGTGGAAAGATGGCCGCTCCCGGGCCCTGTTGCAAGGAGCTCAAATGG  
55 AGGACGCGGCAGCCCGGTGGAGCGGGCGGGTGAAGTACCCACACAAGGAAGAGGG



1 CCTGGTCCCTCACCGGCTGCTGCTTCCTGTGACCCCGTGGTCCTATCGGCGCAATAG  
2 TCACCTCGGGCTTTTGGACACGGCTAGTCGCGGGCGGGGGAGGGGATGTAATGGCGT  
3 TGGAGTTTGTTCACATTTGGTGGGTGGAGACTAGTCAGGCCAGCCTGGCGCTGGAAGT  
4 CTTTTTGAATTTGTCCCCTTGGTGGTGGAGACTAGTCAGGCCAGCCTGGCGCTGGAAGT  
5 GTTCAAAGGTATCTTTTAAACCCTTTTTAGGTGTTGTGAAAACCACCGCTAATTCAAAG  
6 CAACCGGTGATATCTCCTCTAGAGTCGACCTGCAGGATCTAAGCTTGGACAACTACCT  
7 ACAGAGATTTAAAGCTCTAAGGTAAATATAAAATTTACTAGGTTGTGGAATTGTGAGCGC  
8 TCACAATTCCACAGTCGACCCTAGGTTGTGGAATTGTGAGCGCTCACAATTCCACAGTC  
9 GACCCTAGGTTGTGGAATTGTGAGCGCTCACAATTCCACAGTCGACCCTAGTGTATAAT  
10 GTGTTAAACTACGGATCCGTCTCCATTAGGCCTACAATGGTGAGACAAGTAGCCAACA  
11 GGGAAAGGTTGCAAATATCATTTGGGCACACCTATGATAATATTGATGAAGCAGACAGT  
12 ATTCAGCAAGTAACTGAGAGGTGGGAAGCTCAAAGCCAAAGTCCTAATGTGCAGTCAG  
13 GTGAATTTATTGAAAAATTTGAGGCTCCTGGTGGTGCAAATCAAAGAAGTCTCCTCAG  
14 GGATCCTAATTGTTTGTGATTTTAGATTCCAACCAAGCTTGCGGCGCTCAGGAGCTA  
15 AGGAAGCTAAAATGGAGAAAAAATCACTGGATATAACCACCGTTGATATATCCCAATGG  
16 CATCGTAAAGAACGGGCCCTCTGCTAACCATGTTTCATGCCTTCTTTTCTTCTACAG  
17 CTCCTGGGCAACGTGCTGGTTATTGTCTGTCTCATCATTTTTGGCAAAGAATTGTAATA  
18 CGACTCACTATAGGGCGAATTGATATGTCTAGATTAGATAAAAGTAAAGTGATTAACAGC  
19 GCATTAGAGCTGCTTAATGAGGTCGGAATCGAAGGTTTAAACAACCCGTAAACTCGCCCA  
20 GAAGCTAGGTGTAGAGCAGCCTACATTGTATTGGCATGTAAAAAATAAGCGGGCTTTGC  
21 TCGACGCCTTAGCCATTGAGATGTTAGATAGGCACCATACTCACTTTTGCCCTTTAGAA  
22 GGGGAAAGCTGGCAAGATTTTTTACGTAATAACGCTAAAAGTTTTAGATGTGCTTTACTA  
23 AGTCATCGCGATGGAGCAAAGTACATTTAGGTACACGGCCTACAGAAAAACAGTATGA  
24 AACTCTCGAAAATCAATTAGCCTTTTTATGCCAACAGGTTTTTCACTAGAGAATGCATT  
25 ATATGCACTCAGCGCTGTGGGGCATTTTACTTTAGGTTGCGTATTGGAAGATCAAGAGC  
26 ATCAAGTCGCTAAAGAAGAAAGGGAAACACCTACTACTGATAGTATGCCGCCATTATTA  
27 CGACAAGCTATCGAATTATTTGATCACCAAGGTGCAGAGCCAGCCTTCTTATTCGGCCT  
28 TGAATTGATCATATGCGGATTAGAAAAACAACCTAAATGTGAAAGTGGGTCCGCGTACA  
29 GCGGATCCCGGGAATTCAGATCTTATTAAGCAGAAGTGTGAGCTGGCCAGACATGATAA  
30 GATACATTGATGAGTTTGCAGACATGATAAGATACATTGATGAGTTTGGACAAACCACAA  
31 CTAGAATGCAGTAAAAAATGCTTTATTTGTGAAATTTGTGATGCTATTGCTTTATTTGT  
32 AACCATTATAAGCTGCAATAAACAAGTTAACAACAACAATTGCATTCATTTTATGTTTCAG  
33 GTTCAGGGGGAGGTGTGGGAGGTTTTTAAAGCAAGTAAAACCTCTACAAATGTGGTAT  
34 GGAAATGTTAATTAAGTACCATGACCAAATCCCTTAACGTGAGTTTTTCGTTCCACTGA  
35 GCGTCAGACCCCGTAGAAAAGATCAAAGGATCTTCTTGAGATCCTTTTTTTCTGCGCGT  
36 AATCTGCTGCTTGCAAACAAAAAACCACCGCTACCAGCGGTGTTTTGTTGCCGGATC  
37 AAGAGCTACCAACTCTTTTTCCGAAGGTAAGTGGCTTCCAGCAGAGCGCAGATACCAAAT  
38 ACTGTTCTTCTAGTGTAGCCGTAGTTAGGCCACCCTTCAAGAAGTCTGTAGCACCGCC  
39 TACATACCTCGCTCTGCTAATCCTGTTACCAGTGGCTGCTGCCAGTGGCGATAAGTCGT  
40 GTCTTACCGGGTTGGACTCAAGACGATAGTTACCGGATAAGGCGCAGCGGTGCGGCT  
41 GAACGGGGGGTTCGTGCACACAGCCCAGCTTGGAGCGAACGACCTACACCGAACTGA  
42 GATACCTACAGCGTGAGCTATGAGAAAGCGCCACGCTTCCGAAGGGAGAAAGGCGG  
43 ACAGGTATCCGGTAAGCGGCAGGGTTCGGAACAGGAGAGCGCACGAGGGAGCTTCCAG  
44 GGGGAAACGCCTGGTATCTTTATAGTCCTGTGCGGTTTTCGCCACCTCTGACTTGAGCG  
45 TCGATTTTTGTGATGCTCGTCAGGGGGGCGGAGCCTATGGAAAACGCCAGCAACGCG  
46 GCCTTTTTACGGTTCCTGGCCTTTTGTGCGCCTTTTGTCTACATGTTCTTAATTAACCTG  
47 CAGGCGTTACATAACTTACGGTAAATGGCCCGCCTGGCTGACCGCCCAACGACCCCG  
48 CCCATTGACGTCAATAATGACGTATGTTCCCATAGTAACGCCAATAGGGACTTTCCATT  
49 GACGTCAATGGGTGGAGTATTTACGGTAAACTGCCCACTTGGCAGTACATCAAGTGTAT  
50 CATATGCCAAGTACGCCCCCTATTGACGTCAATGACGGTAAATGGCCCGCCTGGCATT  
51 ATGCCCAGTACATGACCTTATGGGACTTTTCTACTTGGCAGTACATCTACGTATTAGTCA  
52 TCGCTATTACCATGATGATGCGGTTTTTGGCAGTACATCAATGGGCGTGGATAGCGGTTT  
53 GACTCACGGGGATTTCCAAGTCTCCACCCCATGACGTCAATGGGAGTTTGTTTTACT  
54 AGTGGAGCCGAGAGTAATTCATACAAAAGGAGGGATCGCCTTCGCAAGGGGAGAGCC  
55 CAGGGACCGTCCCTAAATTCTCACAGACCCAAATCCCTGTAGCCGCCCCACGACAGCG

1 CGAGGAGCATGCGCCAGGGCTGAGCGCGGGTAGATCAGAGCACACAAGCTCACAGT  
2 CCCC GGCGGTGGGGGGAGGGGCGCGCTGAGCGGGGGCCAGGGAGCTGGCGCGGG  
3 GCAA ACTGGGAAAGTGGTGTCTGTGCTGGCTCCGCCCTCTTCCCGAGGGTGGGGGA  
4 GAACGGTATATAAGTGC GG TAGTCGCCTTGGACGTTCTTTTTCGCAACGGGTTTGCCGT  
5 CAGAACGCAGgtgagtgggcgggtgctccgcgggccccggagctggagccctgctctgagcgggccccgggctgat  
6 gcgagtgtcgtccgcagggttagctgtgagcattcccacttcgagtgccgggctgccccgggtgagagtgagggcctagcg  
7 gcaaccccgtagcctgcctcgtgctccggctgaggcctagcgtggtgctccgcggcggcgtgccactccggccgactatgcgtt  
8 tttgctctgctccctcgattgcctccagcagcatgggctaacaaggagggtgtggggctcactctaaggagcccatgaag  
9 cttacgttgataggaatggaagggcaggaggggcgactggggccccggcctcgaggacacatgtccgacggccactgga  
10 tggggcgaggcctgtggctttccgaagcaatcgggctgagtttagcctacctgggcatgtggcctagcactgggacggct  
11 ggctggcgggtgcccgttccctgctcccaacaagggtgaggcctcccggcggcaccagtgtctgcgcgaaagatgg  
12 ccgctcccggggccctgtgcaaggagctcaaaatggaggacgcggcagcccgggtggagcgggcggggtgagtcaccaca  
13 caaaggaagagggccttgcctcgcggcggcgtgcttctgtgacccggtgctatcggccgcatagtcacactcgggcttctt  
14 gagcaccgctcgtcgcggcgggggaggggatctaagcgtggagttgttcacattgggtgggagactagtcaggcca  
15 gcctggcgtggaagtattctggaattggccctttagttggagcaggctaattcctaagcctctagcggttcaaggtatftt  
16 ctaaaccggttccagGTGTTGTGAAAGCCACCGCTAATTCAAAGCAACCGCCACCATGAAACC  
17 AGTAACGTTATACGATGTGCGAGAGTATGCCGGTGTCTCTTATCAGACCGTTTCCCGCG  
18 TGGTGAACCAGGCCAGCCACGTTTCTGCGAAAACGCGGGAAAAAGTGGAAAGCGGCGA  
19 TGGCGGAGCTGAATTACATTCCAACCGCGTGGCACAACAACCTGGCGGGCAAACAGTC  
20 GTTGCTGATTGGCGTTGCCACCTCCAGTCTGGCCCTGCACGCGCCGTCGCAAATTGTC  
21 GCGGCGATTAATCTCGCGCCGATCAACTGGGTGCCAGCGTGGTGGTGTGATGGTA  
22 GAACGAAGCGGCGTGAAGCCTGTAAAGCGGCGGTGCACAATCTTCTCGCGCAACGC  
23 GTCAGTGGGCTGATCATTA ACTATCCGCTGGATGACCAGGATGCCATTGCTGTGGAAG  
24 CTGCCTGCACTAATGTTCCGGCGTTATTTCTTGATGTCTCTGACCAGACACCCATCAAC  
25 AGTATTATTTTCTCCCATGAAGACGGTACGCGACTGGGCGTGGAGCATCTGGTCTGCATT  
26 GGGTCAACCAGCAAATCGCGCTGTTAGCGGGCCATTAAGTTCTGTCTCGGCGGTCTG  
27 CGTCTGGCTGGCTGGCATAAATATCTCACTCGCAATCAAATTCAGCCGATAGCGGAAC  
28 GGGAAAGGCGACTGGAGTGCCATGTCCGGTTTTCAACAAACCATGCAAATGCTGAATGA  
29 GGGCATCGTTCCTACTGCGATGCTGGTTGCCAACGATCAGATGGCGCTGGGCGCAAT  
30 GCGCGCCATTACCGAGTCCGGGCTGCGCGTTGGTGGCGATATCTCGGTAGTGGGATA  
31 CGACGATACCGAAGACAGCTCATGTTATATCCCGCCGTTAACCACCATCAAACAGGATT  
32 TTCGCCTGCTGGGGCAAACCAGCGTGGACCGCTTGCTGCAACTCTCTCAGGGCCAGG  
33 CGGTGAAGGGCAATCAGCTGTTGCCCGTCTCACTGGTGA AAAAGAAAACCCCTGGC  
34 GCCAATACGCAAACCGCCTCTCCCGCGCGTTGGCCGATTCAATTAATGCAGCTGGCA  
35 CGACAGGTTTCCCGACTGGAAGCGGGCAGAGCAGCCTGAGGCTCCTAAGAAGAAG  
36 AGGAAGGTTTGAGAGCAGGTTTCCCAATGACACAAAACGTGCAACTTGAAACTCCGC  
37 CTGGTCTTTCCAGGTCTAGAGGGGTAACACTTTGTA CTGCGTTTGGCTCCACGCTCGAT  
38 CCACTGGCGAGTGTTAGTAACAGCACTGTTGCTTCGTAGCGGAGCATGACGGCCGTGG  
39 GAACTCCTCCTTGGTAACAAGGACCCACGGGGCCAAAAGCCACGCCACACGGGCCC  
40 GTCATGTGTGAACCCAGCACGGCGACTTTACTGCGAAACCCACTTTAAAGTGACATT  
41 GAAACTGGTACCCACACACTGGTGACAGGCTAAGGATGCCCTTCAGGTACCCCGAGGT  
42 AACACGCGACACTCGGGATCTGAGAAGGGGACTGGGGCTTCTATAAAAGCGCTCGGTT  
43 TAAAAGCTTCTATGCCTGAATAGGTGACCGGAGGTGCGCACCTTTCTTTGCAATTAC  
44 TGACCCTATGAATACACTGACTGTTTGACAATTAATCATCGGCATAGTATATCGGCATAG  
45 TATAATACGACTCACTATAGGAGGGCCACCATGATTGAACAAGATGGATTGCACGCAGG  
46 TTCTCCGGCCGCTTGGGTGGAGAGGCTATTCGGCTATGACTGGGCACAACAGACAATC  
47 GGCTGCTCTGATGCCGCCGTGTTCCGGCTGTCAGCGCAGGGGCGCCCGTTCTTTTT  
48 GTCAAGACCGACCTGTCCGGTGCCCTGAATGAACTGCAAGACGAGGCAGCGCGGCTA  
49 TCGTGGCTGGCCACGACGGGCGTTCCTTGCGCAGCTGTGCTCGACGTTGTCACTGAA  
50 GCGGGAAGGGACTGGCTGCTATTGGGCGAAGTGCCGGGGCAGGATCTCCTGTCTATCT  
51 CACCTTGCTCCTGCCGAGAAAGTATCCATCATGGCTGATGCAATGCGGCGGCTGCATA  
52 CGCTTGATCCGGCTACCTGCCATTGACCACCAAGCGAAACATCGCATCGAGCGAGC  
53 ACGTACTCGGATGGAAGCCGGTCTTGTCGATCAGGATGATCTGGACGAAGAGCATCAG  
54 GGGCTCGCGCCAGCCGAACTGTTCCGACGGCTCAAGGCGAGCATGCCCGACGGCGA  
55 GGATCTCGTCTGACACATGGCGATGCCTGCTTGCCGAATATCATGGTGGAAAATGGC

1 CGCTTTTCTGGATTCATCGACTGTGGCCGGCTGGGTGTGGCGGACCGCTATCAGGACA  
2 TAGCGTTGGCTACCCGTGATATTGCTGAAGAGCTTGGCGGCGAATGGGCTGACCGCTT  
3 CCTCGTGCTTTACGGTATCGCCGCTCCCGATTTCGCAGCGCATCGCCTTCTATCGCCTT  
4 CTTGACGAGTTCTTCTGAGCGGGACTCTGGGGTTCGAAATGACCGACCAAGCGAATTC  
5 GCTAGGATTATCCCTAATACCTGCCACCCCACTCTTAATCAGTGGTGGGAAGAACGGTCT  
6 CAGAACTGTTTGTTCATTGGCCATTTAAGTTTAGTAGTAAAAGACTGGTTAATGATAA  
7 CAATGCATCGTAAAACCTTCAGAAGGAAAGGAGAATGTTTTGTGGACCACTTTGGTTTT  
8 CTTTTTTCGTGTGGCAGTTTTAAGTTATTAGTTTTTAAAATCAGTACTTTTTAATGGAAA  
9 CAACTTGACCAAAAATTTGTCACAGAATTTTGAGACCCATTAATAAAGTTAAATGAGAAA  
10 CCTGTGTGTTCCCTTTGGTCAACACCGAGACATTTAGGTGAAAGACATCTAATTCTGGTTT  
11 TACGAATCTGGAACTTCTTGAAAATGTAATTCTTGAGTTAACACTTCTGGGTGGAGAAT  
12 AGGGTTGTTTTCCCCCACATAATTGGAAGGGGAAGGAATATCATTTAAAGCTATGGGA  
13 GGGTTGCTTTGATTACAACACTGGAGAGAAATGCAGCATGTTGCTGATTGCCTGCTACT  
14 AAACAGGCCAAAAACTGAGTCCTTGGGTTCATAGAAAGCTG  
15  
16
